# Supplementary material
Source: HighWire-hosted journal article supplement (https://sit.bmj.com/content/1/1/e000011)
Supplement: inline-supplementary-material-1 [file inline-supplementary-material-1.docx]

Online Table 1: Total Knee Replacement
 Citation
Author(s)
Title
Year
Journal
Impact Factor
Study Design
Time period
Time Span
Target Performance Values
Results
Sample Size
 
HSS Knee Score
U.S. Food and Drug Administration. Summary of Safety and Effectiveness Data: Oxford Meniscal Unicompartmental Knee 
System. 2004; http://www.accessdata.fda.gov/cdrh_docs/pdf/P010014b.pdf. Accessed 9/9/2015, 2015.
U.S. Food and Drug Administration
Summary of Safety and Effectiveness Data: Oxford Meniscal Unicompartmental Knee System
2004
N/A
N/A
Prospective, multi-center, investigational clinical trial; historical control group selected from literature
TKRs performed between June 26, 1989 and June 1, 1994
Follow-up conducted at 6 months, then annually to 5 years (2 year minimum for inclusion)
Success = Good/Excellent HSS score (>70 points)
Pre-op: 23/125 (18.7%) met target HSS score (60.3 ± 10.86, range 27.7-84.5); 2 years post-op: 77/80 (96.3%) met target HSS score (mean 90.0, no SD or range provided)
125 knees enrolled, 80 knees at 2-year minimum follow-up point
Kwak JY, Jeong JH, Lee SH, Jung HJ, Jung YB. Comparison of the clinical outcomes after total knee arthroplasty with the LCS rotating platform mobile bearing knee system and the PFC Sigma RP-F mobile bearing knee system. Clinics in orthopedic surgery. 2012;4(4):256-262.
Kwak JY, Jeong JH, Lee SH, Jung HJ, Jung Y
Comparison of the clinical outcomes after total knee arthroplasty with the LCS rotating platform mobile bearing knee system and the PFC Sigma RP-F mobile bearing knee system
2012
Clinics in orthopedic surgery
.79 (2015 factor)*
Retrospective; all surgeries performed by same surgeon; clinical scores assessed by two independent blinded reviewers
TKRs performed between Feb. 2006 and Feb. 2007
Minimum 2 years, mean 2.9 years
No stated target performance value
Pre-op: 62.1 ± 11.0 for LCS knee recipients, 61.9 ± 14.4 for RP-F. At final follow-up: 90.1 ± 6.1, 89.8 ± 6.4, respectively.
111 knees (61 LCS RP total knees, 50 PFC Sigma RP-F total knees)
Bergschmidt P, Bader R, Ganzer D, et al. Ceramic femoral components in total knee arthroplasty - two year follow-up results of an international prospective multi-centre study. The open orthopaedics journal. 2012;6:172-178.
Bergschmidt P, Bader R, Ganzer D, et al
Ceramic femoral components in total knee arthroplasty - two year follow-up results of an international prospective multi-center study
2012
The open orthopedics journal

Prospective non-comparative multi-center study for the BIOLOX femoral component
Not stated
3, 12, and 24 months
No stated target performance value
Pre-op: 55.5 ± 11.5, 3 months post-op: 77.2 ±10.3, 12 months post-op: 85.6 ± 8.9, 24 months post-op: 85.7 ± 11.7
110 knees at start, 104 at 3 months, 102 at 12 months, 96 at 24 months
Bistolfi A, Lee GC, Deledda D, et al. NexGen(R) LPS mobile bearing total knee arthroplasty: 10-year results. Knee surgery, sports traumatology, arthroscopy : official journal of the ESSKA. 2014;22(8):1786-1792.
Bistolfi A, Lee GC, Deledda D, et a
NexGen(R) LPS mobile bearing total knee arthroplasty: 10-year results
2014
Knee surgery, sports traumatology, arthroscopy: official journal of the ESSKA
3.227
Therapeutic study, retrospective study, case series with no comparison group, level IV
TKRs performed between 2000 and 2005
Average 76.3 months, range 60-122 months
No stated target performance value
Pre-op: 54.6 ± 7.2, range 28-66, post-op: 86.3 ± 6.4, range 43-98
332 knees enrolled, 305 knees in final analysis

Knee Society Knee Score
Kim TW, Park SH, Suh JT. Comparison of mobile-bearing and fixed-bearing designs in high flexion total knee arthroplasty: using a navigation system. Knee surgery & related research. 2012;24(1):25-33.
Kim TW, Park SH, Suh JT
Comparison of mobile-bearing and fixed-bearing designs in high flexion total knee arthroplasty: using a navigation system
2012
Knee surgery & related research

Prospective single-center short-term comparison study using electromagnetic navigation system 
TKRs performed between January and June, 2010
12-18 months follow-up
No stated target performance value
Pre-op: 48.2 ± 6.4 for Mobile knee recipients, 49.5 ± 5.6 for Fixed. At final follow-up: 94.5 ± 3.2, 95.1 ± 2.8, respectively.
32 LPS-Flex Mobile knees and 34 LPS-Flex Fixed knees
Kwak JY, Jeong JH, Lee SH, Jung HJ, Jung YB. Comparison of the clinical outcomes after total knee arthroplasty with the LCS rotating platform mobile bearing knee system and the PFC Sigma RP-F mobile bearing knee system. Clinics in orthopedic surgery. 2012;4(4):256-262.
Kwak JY, Jeong JH, Lee SH, Jung HJ, Jung Y
Comparison of the clinical outcomes after total knee arthroplasty with the LCS rotating platform mobile bearing knee system and the PFC Sigma RP-F mobile bearing knee system
2012
Clinics in orthopedic surgery
.79 (2015 factor)*
Retrospective; all surgeries performed by same surgeon; clinical scores assessed by two independent blinded reviewers
TKRs performed between Feb. 2006 and Feb. 2007
Minimum 2 years, mean 2.9 years
No stated target performance value
Pre-op: 52.8 ± 15.3 for LCS knee recipients, 50.8 ± 16.6 for RP-F. At final follow-up: 93.7 ± 8.0, 93.5 ± 7.9, respectively.
111 knees (61 LCS RP total knees, 50 PFC Sigma RP-F total knees)
Chiu KY, Ng TP, Tang WM, Lam P. Bilateral total knee arthroplasty: One mobile-bearing and one fixed-bearing. Journal of orthopaedic surgery. 2001;9(1):45-50.
Chiu KY, Ng TP, Tang WM, Lam P
Bilateral total knee arthroplasty: One mobile-bearing and one fixed-bearing
2001
Journal of orthopaedic surgery

Prospective single-center comparison using bilateral surgical method
March 1997 to December 1998
24 ± 4 months follow-up, range 16-29
No stated target performance value
Pre-op for all knees: 49.7 ± 12.0, range 32-80. Post-op for all knees: 86.7 ± 11.9, range 47-99
16 patients, 32 knees
Marques CJ, Daniel S, Sufi-Siavach A, Lampe F. No differences in clinical outcomes between fixed- and mobile-bearing computer-assisted total knee arthroplasties and no correlations between navigation data and clinical scores. Knee surgery, sports traumatology, arthroscopy : official journal of the ESSKA. 2015;23(6):1660-1668.
Marques CJ, Daniel S, Sufi-Siavach A, Lampe F
No differences in clinical outcomes between fixed- and mobile-bearing computer-assisted total knee arthroplasties and no correlations between navigation data and clinical scores
2015
Knee surgery, sports traumatology, arthroscopy : official journal of the ESSKA
3.227
Randomized controlled trial, fixed vs. mobile bearing (results listed here for all knees combined)
TKRs performed between April 2004 and June 2007
Follow-up at 1 and 4 years
No stated target performance value
Pre-op: 29.4 ± 10.2, 1 year post-op: 87.5 ± 12.1, 4 years post-op: 86.0 ± 11.5
100 knees enrolled; 96 at 1-year follow-up; 87 at 4-year follow-up
Jauregui JJ, Cherian JJ, Pierce TP, Beaver WB, Issa K, Mont MA. Long-Term Survivorship and Clinical Outcomes Following Total Knee Arthroplasty. The Journal of arthroplasty. 2015.
Jauregui JJ, Cherian JJ, Pierce TP, Beaver WB, Issa K, Mont MA
Long-Term Survivorship and Clinical Outcomes Following Total Knee Arthroplasty
2015
The Journal of arthroplasty
3.055
Retrospective database study
TKRs performed between January 2001 and September 2004
Minimum 10 years follow-up, average 11 years
No stated target performance value
At final follow up: mean 84, range 7-100
125 patients, 145 knees
Chen JY, Chin PL, Tay DK, Chia SL, Lo NN, Yeo SJ. Functional Outcome and Quality of Life after Patient-Specific Instrumentation in Total Knee Arthroplasty. The Journal of arthroplasty. 2015.
Chen JY, Chin PL, Tay DK, Chia SL, Lo NN, Yeo SJ
Functional Outcome and Quality of Life after Patient-Specific Instrumentation in Total Knee Arthroplasty
2015
The Journal of arthroplasty
3.055
Non-randomized single-center trial comparing TKA with PCI
TKRs performed in 2011
Follow-up at 6 months and 2 years
No stated target performance value
Pre-op: 37 ± 16, at 6-month follow-up: 83 ± 12, at 2-year follow-up: 81 ±13
30 TKR patients (30 knees)
Fricka KB, Sritulanondha S, McAsey CJ. To Cement or Not? Two-Year Results of a Prospective, Randomized Study Comparing Cemented Vs. Cementless Total Knee Arthroplasty (TKA). The Journal of arthroplasty. 2015;30(9 Suppl):55-58.
Fricka KB, Sritulanondha S, McAsey CJ
To Cement or Not? Two-Year Results of a Prospective, Randomized Study Comparing Cemented Vs Cementless Total Knee Arthroplasty (TKA)
2015
The Journal of arthroplasty
3.055
Prospective randomized unblinded clinical trial (cemented vs. cementless TKR)
TKRs performed between May 2010 and Feb 2012
Follow-up at 2 years
No stated target performance value
Pre-op: 47.5 in cemented TKR, 44.4 in cementless TKR. At 2-year follow-up: 96.4 in cemented, 92.3 in cementless
50 cemented, 50 cementless enrolled; 46 cemented and 47 cementless at 2 years

Revision
U.S. Food and Drug Administration. Summary of Safety and Effectiveness Data: Oxford Meniscal Unicompartmental Knee System. 2004; http://www.accessdata.fda.gov/cdrh_docs/pdf/P010014b.pdf. Accessed 9/9/2015, 2015.
U.S. Food and Drug Administration
Summary of Safety and Effectiveness Data: Oxford Meniscal Unicompartmental Knee System
2004
N/A
N/A
Prospective, multi-center, investigational clinical trial; historical control group selected from literature
TKRs performed between June 26, 1989 and June 1, 1994
Follow-up conducted at 6 months, then annually (2 year minimum for inclusion)
No revision or removal
96.75% not revised/removed @ 1 year post-op, 86.82% @ 5 years post-op, 80.65% @ 8 years post-op
125 knees enrolled, 80 knees at 2-year minimum follow-up point, 66 at 5 year follow-up, 50 at 8 year follow-up
Steiger RN, Muratoglu O, Lorimer M, Cuthbert AR, Graves SE. Lower prosthesis-specific 10-year revision rate with crosslinked than with non-crosslinked polyethylene in primary total knee arthroplasty. Acta orthopaedica. 2015:1-7.
Steiger RN, Muratoglu O, Lorimer M, Cuthbert AR, Graves SE
Lower prosthesis-specific 10-year revision rate with crosslinked than with non-crosslinked polyethylene in primary total knee arthroplasty
2015
Acta orthopaedica
3.446
Retrospective comparative database analysis; crosslinked vs. non-crosslinked polyethylene
Any TKR with at least 5 years follow up in the AOANJRR was used
Minimum 5 years follow-up
Either major (revision of any component) or minor (patellar resurfacing, tibial insert changes, etc) revisions
Cumulative percent revision at 10 years: 5.8% non-crosslinked, 3.5% crosslinked
Over 180,000 knees
Houdek MT, Shannon SF, Watts CD, Wagner ER, Sems SA, Sierra RJ. Patella Fractures Prior to Total Knee Arthroplasty: Worse Outcomes but Equivalent Survivorship. The Journal of arthroplasty. 2015.
Houdek MT, Shannon SF, Watts CD, Wagner ER, Sems SA, Sierra RJ
Patella Fractures Prior to Total Knee Arthroplasty: Worse Outcomes but Equivalent Survivorship
2015
The Journal of arthroplasty
3.055
Retrospective single-center comparative study of a joint registry (previous patella fracture vs. control group)
TKRs performed between 1990 and 2012
Revision rate assessed at 5, 10, and 15 years
Revision surgery = subsequent removal or exchange of any components
Survival rates of control group: 5 year follow-up 97% ± 2%; 10 year follow-up 93% ± 3%; 15 year follow-up 86% ± 6%
19,641 knees in control group
Fricka KB, Sritulanondha S, McAsey CJ. To Cement or Not? Two-Year Results of a Prospective, Randomized Study Comparing Cemented Vs. Cementless Total Knee Arthroplasty (TKA). The Journal of arthroplasty. 2015;30(9 Suppl):55-58.
Fricka KB, Sritulanondha S, McAsey CJ
To Cement or Not? Two-Year Results of a Prospective, Randomized Study Comparing Cemented Vs Cementless Total Knee Arthroplasty (TKA)
2015
The Journal of arthroplasty
3.055
Prospective randomized unblinded clinical trial (cemented vs. cementless TKR)
TKRs performed between May 2010 and Feb 2012
Follow-up at 2 years
Success = no revision or removal of TKR
98% survival (1 revision in each group)
50 cemented, 50 cementless enrolled; 46 cemented and 47 cementless at 2 years

Quality of Life
QoL Test Type
Bergschmidt P, Bader R, Ganzer D, et al. Ceramic femoral components in total knee arthroplasty - two year follow-up results of an international prospective multi-centre study. The open orthopaedics journal. 2012;6:172-178.
Bergschmidt P, Bader R, Ganzer D, et al
Ceramic femoral components in total knee arthroplasty - two year follow-up results of an international prospective multi-centre study
2012
The open orthopedics journal

Prospective non-comparative multi-center study for the BIOLOX femoral component
Not stated
3, 12, and 24 months
No stated target performance value
Pre-op: 49.1 ± 17.6; 3 months post-op: 56.2 ± 21.3; 12 months post-op: 63.9 ± 19.2; 24 months post-op: 62.3 ± 22.6 (PCS and MCS not reported separately)
110 knees at start, 104 at 3 months, 102 at 12 months, 96 at 24 months
SF-36
Jauregui JJ, Cherian JJ, Pierce TP, Beaver WB, Issa K, Mont MA. Long-Term Survivorship and Clinical Outcomes Following Total Knee Arthroplasty. The Journal of arthroplasty. 2015.
Jauregui JJ, Cherian JJ, Pierce TP, Beaver WB, Issa K, Mont MA
Long-Term Survivorship and Clinical Outcomes Following Total Knee Arthroplasty
2015
The Journal of arthroplasty
3.055
Retrospective database study
TKRs performed between January 2001 and September 2004
Minimum 10 years follow-up, average 11 years
No stated target performance value
At final follow-up: physical component mean 41 (range 13-68), mental component mean 51 (range 11-74)
125 patients, 145 knees
SF-36
Chen JY, Chin PL, Tay DK, Chia SL, Lo NN, Yeo SJ. Functional Outcome and Quality of Life after Patient-Specific Instrumentation in Total Knee Arthroplasty. The Journal of arthroplasty. 2015.
Chen JY, Chin PL, Tay DK, Chia SL, Lo NN, Yeo SJ
Functional Outcome and Quality of Life after Patient-Specific Instrumentation in Total Knee Arthroplasty
2015
The Journal of arthroplasty
3.055
Prospective non-randomized trial comparing TKA with PCI
TKRs performed in 2011
Follow-up at 6 months and 2 years
No stated target performance value
Physical Component: Pre-op 32 ± 10, at 6 months 49 ± 8, at 2 years 48 ± 8. Mental Component: Pre-op 52 ± 11, at 6 months 54 ± 9, at 2 years 57 ± 13
30 TKR patients (30 knees)
SF-36
Mandzuk LL, McMillan DE, Bohm ER. A longitudinal study of quality of life and functional status in total hip and total knee replacement patients. International journal of orthopaedic and trauma nursing. 2015;19(2):102-113.
Mandzuk LL, McMillan DE, Bohm ER
A longitudinal study of quality of life and functional status in total hip and total knee replacement patients
2015
International journal of orthopaedic and trauma nursing

Longitudinal retrospective study
TKRs performed between Oct 2004 and May 2007
Assessed 1 month pre-operatively and 1 year post-operatively
No stated target performance value
Physical Component: Pre-op 29.2 ± .5, at 1 year 40.2 ± .5. Mental Component: Pre-op 51.5 ± .6, at 1 year 53.4 ± .5 (least square means)
450 patients
SF-12
Fransen B, Hoozemans MJ, Keijser LC, van Lent ME, Verheyen CC, Burger BJ. Does Insert Type Affect Clinical and Functional Outcome in Total Knee Arthroplasty? A Randomised Controlled Clinical Trial With 5-Year Follow-Up. The Journal of arthroplasty. 2015.
Fransen B, Hoozemans MJ, Keijser LC, van Lent ME, Verheyen CC, Burger BJ
Does Insert Type Affect Clinical and Functional Outcome in Total Knee Arthroplasty? A Randomised Controlled Clinical Trial With 5-Year Follow-Up
2015
The Journal of arthroplasty
3.055
Multicenter, prospective, randomized clinical study (2x2, mobile-bearing (rotating vs. rotating-translating insert) vs. fixed-bearing (normal vs. deep dish insert))
Patients recruited between Feb 2002 and June 2006
Follow-up at 1 year and 5 years
No stated target performance value
Fixed-bearing: Pre-op 32.8 (20.1-55.1) physical component/53.8 (33.5-65.9) mental component, at 1 year 42.0 (19.5-56.2)/52.5 (33.2-65.8), at 5 years 42.9 (18.7-61.0)/52.3 (31.5-66.8). Mobile-bearing: Pre-op 30.3 (0.0-50.8)/54.8 (23.2-68.3), at 1 year 43.5 (17.3-56.6)/54.9 (33.2-63.5), at 5 years 43.3 (17.1-59.7)/54.9 (33.7-65.6)
146 knees at 5-year follow-up
SF-12
*https://www.ncbi.nlm.nih.gov/pmc/articles/PMC4870313/
Online Table 2: Total Hip Replacement
 
Citation
Title
Year
Journal
Impact Factor
Study Design
Time period
Time Span
Target Performance Values
Results*
Sample Size 
HHS
U.S. Food and Drug Administration. Summary of Safety and Effectiveness Data: Ceramax Ceramic Total Hip System. 2010; http://www.accessdata.fda.gov/cdrh_docs/pdf7/P070026b.pdf. Accessed 9/9/2015, 2015.
U.S. Food and Drug Administration
Summary of Safety and Effectiveness Data: Ceramax Ceramic Total Hip System
2010
N/A
N/A
Prospective, multi-center, nonrandomized, controlled clinical study
THAs performed between Oct 2003 and Dec 2005
Follow-up conducted postoperatively at 6 weeks, 6 months, and then annually
≥80 = success
Pre-op: 52.7, range 18.0-76.0; 2-year post-op 95.4
242 enrolled; 217 at 2-year follow-up
U.S. Food and Drug Administration. Summary of Safety and Effectiveness Data: Conserve Plus Total Resurfacing Hip System. 2009; http://www.accessdata.fda.gov/cdrh_docs/pdf3/P030042b.pdf. Accessed 9/9/2015, 2015.
U.S. Food and Drug Administration
Summary of Safety and Effectiveness Data: Conserve Plus Total Resurfacing Hip System
2009
N/A
N/A
Prospective, multi-center study with historical control
THAs performed between Aug 2000 and Nov 2006
Follow-up conducted postoperatively at 6 weeks, 6 months, and then annually
Minimum 80 points, with 15 point increase from baseline
Pre-op: 49.4 ± 11.7, 45.3 ± 12.8, 47.6 ± 14.2. 2 years post-op: 94.9 ± 7.7, 94.4 ± 10.0, 93.1 ± 10.0
Three cohort study: investigational n=292, ceramic control n=341, metal control = 322
MacDonald SJ, McCalden RW, Chess DG, et al. Metal-on-metal versus polyethylene in hip arthroplasty: a randomized clinical trial. Clinical orthopaedics and related research. 2003(406):282-296.
MacDonald SJ, McCalden RW, Chess DG, et al
Metal-on-metal versus polyethylene in hip arthroplasty: a randomized clinical trial
2003
Clinical orthopaedics and related research
.79 (2015 factor)*
Prospective, randomized, blinded clinical trial
THAs performed between Mar 1998 and Oct 1999
Mean follow-up 3.2 years, range 2.2-3.9
No target value
Pre-op: metal-on-metal 46.5 ± 13.4, metal-on-polyethylene 46.6 ± 12.4. 2-year post-op: 91.6 ± 11.5, 91.2 ± 12.5
41 enrolled, 40 at final follow-up
Stambough JB, Pashos G, Bohnenkamp FC, Maloney WJ, Martell JM, Clohisy JC. Long-Term Results of Total Hip Arthroplasty with 28-Millimeter Cobalt-Chromium Femoral Heads on Highly Cross-Linked Polyethylene in Patients 50Years and Less. The Journal of arthroplasty. 2015.
Stambough JB, Pashos G, Bohnenkamp FC, Maloney WJ, Martell JM, Clohisy JC
Long-Term Results of Total Hip Arthroplasty with 28-Millimeter Cobalt-Chromium Femoral Heads on Highly Cross-Linked Polyethylene in Patients 50Years and Less
2015
The Journal of arthroplasty
3.055
Retrospective data review of institutional registry data
THAs performed between Jul 2001 and Feb 2004
Mean follow-up 10 years ± 10.8 months, range 98-143 months

Pre-op: 46.3 ± 14.7, at final follow-up: 81.9 ± 19.0
72 patients, 75 hips
Lim SJ, Jang SP, Kim DW, Moon YW, Park YS. Primary Ceramic-on-ceramic Total Hip Arthroplasty Using a 32-mm Ceramic Head With a Titanium-alloy Sleeve. Clinical orthopaedics and related research. 2015.
Lim SJ, Jang SP, Kim DW, Moon YW, Park YS
Primary Ceramic-on-ceramic Total Hip Arthroplasty Using a 32-mm Ceramic Head With a Titanium-alloy Sleeve
2015
Clinical orthopaedics and related research
.79 (2015 factor)*
Retrospective single-center review
THAs performed between Nov 2005 and Aug 2009
Mean follow-up 6.5 years, range 5-9
>90 = excellent, >80 = good
Pre-op: 47, range 17-77. At last follow-up: 93, range 45-100. Good or excellent results in 97% of hips.
245 patients, 274 hips
Pierce TP, Jauregui JJ, Cherian JJ, Elmallah RD, Robinson K, Mont MA. Prospective evaluation of short and mid-term outcomes of total hip arthroplasty using the AccoladeTM stem. Hip international : the journal of clinical and experimental research on hip pathology and therapy. 2015:0.
Pierce TP, Jauregui JJ, Cherian JJ, Elmallah RD, Robinson K, Mont MA
Prospective evaluation of short and mid-term outcomes of total hip arthroplasty using the AccoladeTM stem
2015
Hip international: the journal of clinical and experimental research on hip pathology and therapy
1.055
Multi-center prospectively collected database
THAs performed between 2006 and 2009
2- and 5-year follow-up collected
No target value
Pre-op: 51, range 15-76. 2-years post-op: 89, range 31-100. 5-years post-op: 92, range 26-100.
188 patients, 194 hips
Park KS, Seon JK, Yoon TR. The Survival Analysis in Third-Generation Ceramic-On-Ceramic Total Hip Arthroplasty. The Journal of arthroplasty. 2015.
Park KS, Seon JK, Yoon TR
The Survival Analysis in Third-Generation Ceramic-On-Ceramic Total Hip Arthroplasty
2015
The Journal of arthroplasty
3.055
Retrospective review and follow-up
THAs performed between Oct 2002 and Dec 2006
Mean follow-up 5.9 years, range 2.0-8.9
No target value
Pre-op: 65.3, range 41-75; final follow-up: 93.8, range 74-100
527 patients, 577 hips
Aoude AA, Antoniou J, Epure LM, Huk OL, Zukor DJ, Tanzer M. Midterm Outcomes of the Recently FDA Approved Ceramic on Ceramic Bearing in Total Hip Arthroplasty Patients Under 65Years of Age. The Journal of arthroplasty. 2015;30(8):1388-1392.
Aoude AA, Antoniou J, Epure LM, Huk OL, Zukor DJ, Tanzer M
Midterm Outcomes of the Recently FDA Approved Ceramic on Ceramic Bearing in Total Hip Arthroplasty Patients Under 65 Years of Age
2015
The Journal of arthroplasty
3.055
Retrospective cohort study
THAs performed between Dec 2004 and Dec 2010
Mean follow-up 6 ± 1.7 years
>90 = excellent, >80 = good
88.1 ± 13.6, range 32-99; 64% excellent
115 patients, 133 hips
Hill JC, Diamond OJ, O'Brien S, Boldt JG, Stevenson M, Beverland DE. Early surveillance of ceramic-on-metal total hip arthroplasty. The bone & joint journal. 2015;97-B(3):300-305.
Hill JC, Diamond OJ, O'Brien S, Boldt JG, Stevenson M, Beverland DE
Early surveillance of ceramic-on-metal total hip arthroplasty
2015
The bone & joint journal
2.953
Retrospective single-center review and follow-up
THAs performed between Oct 2007 and Oct 2009
Mean follow-up 34 ± 5.1 months, range 23 to 45
No target value
Pre-op: 37.6, range 10-71. 1 year post-op: 88.1, range 30-100. Final follow-up: 92.8 ± 10.5, range 29-100
266 patients, 281 hips
Revision
U.S. Food and Drug Administration. Summary of Safety and Effectiveness Data: Ceramax Ceramic Total Hip System. 2010; http://www.accessdata.fda.gov/cdrh_docs/pdf7/P070026b.pdf. Accessed 9/9/2015, 2015.
U.S. Food and Drug Administration
Summary of Safety and Effectiveness Data: Ceramax Ceramic Total Hip System
2010
N/A
N/A
Prospective, multi-center, nonrandomized, controlled clinical study
THAs performed between Oct 2003 and Dec 2005
Follow-up conducted postoperatively at 6 weeks, 6 months, and then annually
No component removed or replaced
2.1% revision rate at 2+ years
242 enrolled; 217 at 2-year follow-up
U.S. Food and Drug Administration. Summary of Safety and Effectiveness Data: Conserve Plus Total Resurfacing Hip System. 2009; http://www.accessdata.fda.gov/cdrh_docs/pdf3/P030042b.pdf. Accessed 9/9/2015, 2015.
U.S. Food and Drug Administration
Summary of Safety and Effectiveness Data: Conserve Plus Total Resurfacing Hip System
2009
N/A
N/A
Prospective, multi-center study with historical control
THAs performed between Aug 2000 and Nov 2006
Follow-up conducted postoperatively at 6 weeks, 6 months, and then annually
Did not undergo revision, removal, or replacement of any component
8% revision at 2+ years
Three cohort study: investigational n=292, ceramic control n=341, metal control = 322
Stambough JB, Pashos G, Bohnenkamp FC, Maloney WJ, Martell JM, Clohisy JC. Long-Term Results of Total Hip Arthroplasty with 28-Millimeter Cobalt-Chromium Femoral Heads on Highly Cross-Linked Polyethylene in Patients 50Years and Less. The Journal of arthroplasty. 2015.
Stambough JB, Pashos G, Bohnenkamp FC, Maloney WJ, Martell JM, Clohisy JC
Long-Term Results of Total Hip Arthroplasty with 28-Millimeter Cobalt-Chromium Femoral Heads on Highly Cross-Linked Polyethylene in Patients 50Years and Less
2015
The Journal of arthroplasty
3.055

Retrospective data review of institutional registry data

THAs performed between Jul 2001 and Feb 2004 

Mean follow-up 10 years ± 10.8 months, range 98-143 months
Any revision or removal
92% 10-year survival rate
72 patients, 75 hips
Fitch DA, Ancarani C, Bordini B. Long-term survivorship and complication rate comparison of a cementless modular stem and cementless fixed neck stems for primary total hip replacement. International orthopaedics. 2015;39(9):1827-1832.
Fitch DA, Ancarani C, Bordini B
Long-term survivorship and complication rate comparison of a cementless modular stem and cementless fixed neck stems for primary total hip replacement
2015
International orthopaedics
2.52
Retrospective database study
THAs performed between Jan 2000 and Dec 2012
Mean follow-up 9.0 years, range .02-13.6
Any revision or removal

3.9% revision rate
692 hips
Lim SJ, Jang SP, Kim DW, Moon YW, Park YS. Primary Ceramic-on-ceramic Total Hip Arthroplasty Using a 32-mm Ceramic Head With a Titanium-alloy Sleeve. Clinical orthopaedics and related research. 2015.
Lim SJ, Jang SP, Kim DW, Moon YW, Park YS
Primary Ceramic-on-ceramic Total Hip Arthroplasty Using a 32-mm Ceramic Head With a Titanium-alloy Sleeve
2015
Clinical orthopaedics and related research
.79 (2015 factor)*
Retrospective single-center review
THAs performed between Nov 2005 and Aug 2009
Mean follow-up 6.5 years, range 5-9
Revision for any reason
98% 9-year survival rate
245 patients, 274 hips
Pierce TP, Jauregui JJ, Cherian JJ, Elmallah RD, Robinson K, Mont MA. Prospective evaluation of short and mid-term outcomes of total hip arthroplasty using the AccoladeTM stem. Hip international : the journal of clinical and experimental research on hip pathology and therapy. 2015:0.
Pierce TP, Jauregui JJ, Cherian JJ, Elmallah RD, Robinson K, Mont MA
Prospective evaluation of short and mid-term outcomes of total hip arthroplasty using the AccoladeTM stem
2015
Hip international: the journal of clinical and experimental research on hip pathology and therapy
1.055
Multi-center prospectively collected database
THAs performed between 2006 and 2009
2- and 5-year follow-up collected
Revision for any reason
97.9% 5-year all-cause survival
188 patients, 194 hips
Park KS, Seon JK, Yoon TR. The Survival Analysis in Third-Generation Ceramic-On-Ceramic Total Hip Arthroplasty. The Journal of arthroplasty. 2015.
Park KS, Seon JK, Yoon TR
The Survival Analysis in Third-Generation Ceramic-On-Ceramic Total Hip Arthroplasty
2015
The Journal of arthroplasty
3.055
Retrospective review and follow-up
THAs performed between Oct 2002 and Dec 2006
Mean follow-up 5.9 years, range 2.0-8.9
Revision for any reason
5.2% at final follow-up
527 patients, 577 hips
Aoude AA, Antoniou J, Epure LM, Huk OL, Zukor DJ, Tanzer M. Midterm Outcomes of the Recently FDA Approved Ceramic on Ceramic Bearing in Total Hip Arthroplasty Patients Under 65Years of Age. The Journal of arthroplasty. 2015;30(8):1388-1392.
Aoude AA, Antoniou J, Epure LM, Huk OL, Zukor DJ, Tanzer M
Midterm Outcomes of the Recently FDA Approved Ceramic on Ceramic Bearing in Total Hip Arthroplasty Patients Under 65Years of Age
2015
The Journal of arthroplasty
3.055
Retrospective cohort study
THAs performed between Dec 2004 and Dec 2010
Mean follow-up 6 ± 1.7 years
Any revision or replacement surgery
98.496% survival at final follow-up
115 patients, 133 hips
Hill JC, Diamond OJ, O'Brien S, Boldt JG, Stevenson M, Beverland DE. Early surveillance of ceramic-on-metal total hip arthroplasty. The bone & joint journal. 2015;97-B(3):300-305.
Hill JC, Diamond OJ, O'Brien S, Boldt JG, Stevenson M, Beverland DE
Early surveillance of ceramic-on-metal total hip arthroplasty
2015
The bone & joint journal
2.953
Retrospective single-center review and follow-up
THAs performed between Oct 2007 and Oct 2009
Mean follow-up 34 ± 5.1 months, range 23 to 45
Any revision
96.6% 5-year survival rate
266 patients, 281 hips

Quality of Life
Physical Component
Mental Component

Garbuz DS, Tanzer M, Greidanus NV, Masri BA, Duncan CP. The John Charnley Award: Metal-on-metal hip resurfacing versus large-diameter head metal-on-metal total hip arthroplasty: a randomized clinical trial. Clinical orthopaedics and related research. 2010;468(2):318-325.
Garbuz DS, Tanzer M, Greidanus NV, Masri BA, Duncan CP
The John Charnley Award: Metal-on-metal hip resurfacing versus large-diameter head metal-on-metal total hip arthroplasty: a randomized clinical trial
2010
Clinical orthopaedics and related research
.79 (2015 factor)*
Randomized two-armed clinical trial
THAs performed between Jun 2005 and Aug 2008
Mean follow-up 1.1 years, range .8-2.2
No target value; SF-36 administered
Pre-op: 33.598, 1-year post-op: 51.288
Pre-op: 50.652; 1-year post-op: 55.136
107 patients randomized; 73 in final QoL follow-up
MacDonald SJ, McCalden RW, Chess DG, et al. Metal-on-metal versus polyethylene in hip arthroplasty: a randomized clinical trial. Clinical orthopaedics and related research. 2003(406):282-296.
MacDonald SJ, McCalden RW, Chess DG, et al
Metal-on-metal versus polyethylene in hip arthroplasty: a randomized clinical trial
2003
Clinical orthopaedics and related research
.79 (2015 factor)*
Prospective, randomized, blinded clinical trial
THAs performed between Mar 1998 and Oct 1999
Mean follow-up 3.2 years, range 2.2-3.9
No target value; SF-12 administered
Pre-op: metal-on-metal 32.8 ± 10.2, metal-on-polyethylene 31.1 ± 4.7. 2-years post-op: 47.2 ± 9.6 & 5.5 ± 11.7
Pre-op: metal-on-metal 53.5 ± 9.6, metal-on-polyethylene 53.0 ± 11.6. 2-years post-op: 55.9 ± 6.2 & 53.3 ± 11.7
41 enrolled, 40 at final follow-up
Boardman DL, Dorey F, Thomas BJ, Lieberman JR. The accuracy of assessing total hip arthroplasty outcomes: a prospective correlation study of walking ability and 2 validated measurement devices. The Journal of arthroplasty. 2000;15(2):200-204.
Boardman DL, Dorey F, Thomas BJ, Lieberman JR
The accuracy of assessing total hip arthroplasty outcomes: a prospective correlation study of walking ability and 2 validated measurement devices
2000
The Journal of arthroplasty
3.055
Single-center prospective, WOMAC & SF-36 validation study
THAs performed between Jan 1995 and Oct 1996
1 year postoperative follow-up
No target value; SF-36 administered
Pre-op: 31.0 ± 7.4, 1 year post-op: 46.7 ± 9.4
Not reported
30 patients, 30 hips
Pierce TP, Jauregui JJ, Cherian JJ, Elmallah RD, Robinson K, Mont MA. Prospective evaluation of short and mid-term outcomes of total hip arthroplasty using the AccoladeTM stem. Hip international : the journal of clinical and experimental research on hip pathology and therapy. 2015:0.
Pierce TP, Jauregui JJ, Cherian JJ, Elmallah RD, Robinson K, Mont MA
Prospective evaluation of short and mid-term outcomes of total hip arthroplasty using the AccoladeTM stem
2015
Hip international: the journal of clinical and experimental research on hip pathology and therapy
1.055
Multi-center prospectively collected database
THAs performed between 2006 and 2009
2- and 5-year follow-up collected
No target value; SF-12 administered
Pre-op: 33, 2 years post-op: 46, 5 years post-op: 45
Pre-op: 50, 2 years post-op: 54, 5 years post-op: 53
188 patients, 194 hips
Mandzuk LL, McMillan DE, Bohm ER. A longitudinal study of quality of life and functional status in total hip and total knee replacement patients. International journal of orthopaedic and trauma nursing. 2015;19(2):102-113.
Mandzuk LL, McMillan DE, Bohm ER
A longitudinal study of quality of life and functional status in total hip and total knee replacement patients
2015
International journal of orthopaedic and trauma nursing
 
Longitudinal retrospective study
THAs performed between Oct 2004 and May 2007
Assessed 1 month pre-operatively and 1 year post-operatively
No target value; SF-12 administered
Pre-op: 27.9 ±.5, 1-year post-op: 42.6 ±.5
Pre-op: 49.2 ± .7, 1-year post-op: 54.4 ±.6
450 patients
WOMAC
Garbuz DS, Tanzer M, Greidanus NV, Masri BA, Duncan CP. The John Charnley Award: Metal-on-metal hip resurfacing versus large-diameter head metal-on-metal total hip arthroplasty: a randomized clinical trial. Clinical orthopaedics and related research. 2010;468(2):318-325.
Garbuz DS, Tanzer M, Greidanus NV, Masri BA, Duncan CP
The John Charnley Award: Metal-on-metal hip resurfacing versus large-diameter head metal-on-metal total hip arthroplasty: a randomized clinical trial
2010
Clinical orthopaedics and related research
.79 (2015 factor)*
Randomized two-armed clinical trial
THAs performed between Jun 2005 and Aug 2008
Mean follow-up 1.1 years, range .8-2.2
No target value; normalized WOMAC reported (best score 100); WOMAC Global reported
Pre-op: 52.606, 1-year post-op: 90.186
107 patients randomized; 73 in final QoL follow-up
MacDonald SJ, McCalden RW, Chess DG, et al. Metal-on-metal versus polyethylene in hip arthroplasty: a randomized clinical trial. Clinical orthopaedics and related research. 2003(406):282-296.
MacDonald SJ, McCalden RW, Chess DG, et al
Metal-on-metal versus polyethylene in hip arthroplasty: a randomized clinical trial
2003
Clinical orthopaedics and related research
.79 (2015 factor)*
Prospective, randomized, blinded clinical trial
THAs performed between Mar 1998 and Oct 1999
Mean follow-up 3.2 years, range 2.2-3.9
No target value; non-normalized WOMAC reported (best score 0)
Pre-op: metal-on-metal 58.7 ± 15.3, metal-on-polyethylene 59.1 ± 14.5. 2-year post-op: 17.3 ± 15.1, 19.9 ± 18.9
41 enrolled, 40 at final follow-up
Boardman DL, Dorey F, Thomas BJ, Lieberman JR. The accuracy of assessing total hip arthroplasty outcomes: a prospective correlation study of walking ability and 2 validated measurement devices. The Journal of arthroplasty. 2000;15(2):200-204.
Boardman DL, Dorey F, Thomas BJ, Lieberman JR
The accuracy of assessing total hip arthroplasty outcomes: a prospective correlation study of walking ability and 2 validated measurement devices
2000
The Journal of arthroplasty
3.055
Single-center prospective, WOMAC & SF-36 validation study
THAs performed between Jan 1995 and Oct 1996
1 year postoperative follow-up
No target value; non-normalized WOMAC reported (best score 0)
Pre-op: 4.0 ± 1.9, 1 year post-op: 1.6 ± 2.1
30 patients, 30 hips
Stambough JB, Pashos G, Bohnenkamp FC, Maloney WJ, Martell JM, Clohisy JC. Long-Term Results of Total Hip Arthroplasty with 28-Millimeter Cobalt-Chromium Femoral Heads on Highly Cross-Linked Polyethylene in Patients 50Years and Less. The Journal of arthroplasty. 2015.
Stambough JB, Pashos G, Bohnenkamp FC, Maloney WJ, Martell JM, Clohisy JC
Long-Term Results of Total Hip Arthroplasty with 28-Millimeter Cobalt-Chromium Femoral Heads on Highly Cross-Linked Polyethylene in Patients 50Years and Less
2015
The Journal of arthroplasty
3.055
Retrospective data review of institutional registry data
THAs performed between Jul 2001 and Feb 2004
Mean follow-up 10 years ± 10.8 months, range 98-143 months
No target value; normalized WOMAC reported (best score 100); WOMAC Function reported
Pre-op: 41.8 ± 17.1, at final follow-up: 81.8 ± 22.3
72 patients, 75 hips
*Unless stated otherwise Mean±SD is reported
Online Table 3: EVAR
 
Citation
Author(s)
Title
Year
Journal
Impact Factor
Study Design
Time period
Time Span
Target Performance Values
Results
Sample Size
30-Day All-Cause Mortality
Ryer EJ, Garvin RP, Thomas B, Kuivaniemi H, Franklin DP, Elmore JR. Patients with familial abdominal aortic aneurysms are at increased risk for endoleak and secondary intervention following elective endovascular aneurysm repair. Journal of vascular surgery. 2015.
Ryer EJ, Garvin RP, Thomas B, Kuivaniemi H, Franklin DP, Elmore JR
Patients with familial abdominal aortic aneurysms are at increased risk for endoleak and secondary intervention following elective endovascular aneurysm repair
2015
Journal of vascular surgery
3.536
Retrospective chart review, two-armed by AAA type
EVARs performed between Jan 2004 and Dec 2014
Postoperative
Death
2% in each group
260 EVAR patients (55 in familial group, 205 in sporadic group)
Garg T, Baker LC, Mell MW. Postoperative Surveillance and Long-term Outcomes After Endovascular Aneurysm Repair Among Medicare Beneficiaries. JAMA surgery. 2015.
Garg T, Baker LC, Mell MW
Postoperative Surveillance and Long-term Outcomes After Endovascular Aneurysm Repair Among Medicare Beneficiaries
2015
JAMA surgery
7.956
Retrospective Medicare database analysis, two-armed by surveillance level
EVARs performed between Jan 2002 and Dec 2005
Perioperative (not explicitly defined)
Death
2.80%
7888 EVAR patients (3944 in each cohort)
Yamamoto K, Komori K, Banno H, Narita H, Kodama A, Sugimoto M. Validation of Patient Selection for Endovascular Aneurysm Repair or Open Repair of Abdominal Aortic Aneurysm- Single-Center Study. Circulation journal : official journal of the Japanese Circulation Society. 2015;79(8):1699-1705.
Yamamoto K, Komori K, Banno H, Narita H, Kodama A, Sugimoto M
Validation of Patient Selection for Endovascular Aneurysm Repair or Open Repair of Abdominal Aortic Aneurysm- Single-Center Study
2015
Circulation journal: official journal of the Japanese Circulation Society
3.544
Single-center retrospective observational study
EVARs performed between Jun 2007 and Apr 2014
30 days
Death
0.20%
426 EVAR patients
Hicks CW, Wick EC, Canner JK, et al. Hospital-Level Factors Associated With Mortality After Endovascular and Open Abdominal Aortic Aneurysm Repair. JAMA surgery. 2015;150(7):632-636.
Hicks CW, Wick EC, Canner JK, et al
Hospital-Level Factors Associated With Mortality After Endovascular and Open Abdominal Aortic Aneurysm Repair
2015
JAMA surgery
7.956
Retrospective database analysis
EVARs performed between Jul 2010 and Nov 2012
30 days
Death
4.30%
8784 EVAR patients
Huang Y, Gloviczki P, Oderich GS, et al. Outcome after open and endovascular repairs of abdominal aortic aneurysms in matched cohorts using propensity score modeling. Journal of vascular surgery. 2015;62(2):304-311 e302.
Huang Y, Gloviczki P, Oderich GS, et al
Outcome after open and endovascular repairs of abdominal aortic aneurysms in matched cohorts using propensity score modeling
2015
Journal of vascular surgery
3.536
Retrospective clinical data review
EVARS performed between 2000 and 2011
30 days
Death
0.90%
588 EVAR patients
Hicks CW, Black JH, 3rd, Arhuidese I, et al. Mortality variability after endovascular versus open abdominal aortic aneurysm repair in a large tertiary vascular center using a Medicare-derived risk prediction model. Journal of vascular surgery. 2015;61(2):291-297.
Hicks CW, Black JH, 3rd, Arhuidese I, et al
Mortality variability after endovascular versus open abdominal aortic aneurysm repair in a large tertiary vascular center using a Medicare-derived risk prediction model
2015
Journal of vascular surgery
3.536
Retrospective single-center analysis
EVARs performed between Nov 2003 and Aug 2012
30 days
Death
1.90%
214 EVAR patients
Basoor A, Patel KC, Halabi AR, et al. Periprocedural and long-term outcomes of endovascular abdominal aortic aneurysm repair in cardiology practice. Catheterization and cardiovascular interventions : official journal of the Society for Cardiac Angiography & Interventions. 2014;84(7):1173-1179.
Basoor A, Patel KC, Halabi AR, et al
Periprocedural and long-term outcomes of endovascular abdominal aortic aneurysm repair in cardiology practice
2014
Catheterization and cardiovascular interventions: official journal of the Society for Cardiac Angiography & Interventions
2.602
Retrospective chart review
EVARs performed between Sept 2005 and Jan 2011
30 days
Death
1.80%
170 patients
Becquemin JP, Pillet JC, Lescalie F, et al. A randomized controlled trial of endovascular aneurysm repair versus open surgery for abdominal aortic aneurysms in low- to moderate-risk patients. Journal of vascular surgery. 2011;53(5):1167-1173 e1161.
Becquemin JP, Pillet JC, Lescalie F, et al
A randomized controlled trial of endovascular aneurysm repair versus open surgery for abdominal aortic aneurysms in low- to moderate-risk patients
2011
Journal of vascular surgery
3.536
Multi-center two-armed randomized clinical trial
EVARs performed between Mar 2003 and Mar 2008
30 days
Death
1.30%
163 EVAR patients
Kaladji A, Steintmetz E, Goueffic Y, Bartoli M, Cardon A, Academic Association for Surgical R. Long-Term Results of Large Stent Grafts to Treat Abdominal Aortic Aneurysms. Annals of vascular surgery. 2015.
Kaladji A, Steintmetz E, Goueffic Y, Bartoli M, Cardon A, Academic Association for Surgical R
Long-Term Results of Large Stent Grafts to Treat Abdominal Aortic Aneurysms
2015
Annals of vascular surgery
1.145
Multi-center retrospective study, two-armed by stent size
EVARs performed between Nov 1998 and Dec 2011
30 days
Death
1.8% in group 1, 1% in group 2
908 EVAR patients

Endoleak
Kaladji A, Steintmetz E, Goueffic Y, Bartoli M, Cardon A, Academic Association for Surgical R. Long-Term Results of Large Stent Grafts to Treat Abdominal Aortic Aneurysms. Annals of vascular surgery. 2015.
Kaladji A, Steintmetz E, Goueffic Y, Bartoli M, Cardon A, Academic Association for Surgical R
Long-Term Results of Large Stent Grafts to Treat Abdominal Aortic Aneurysms
2015
Annals of vascular surgery
1.145
Multi-center retrospective study, two-armed by stent size
EVARs performed between Nov 1998 and Dec 2011
Mean follow-up 38 ± 28.2 months
Any proximal endoleaks
5.6% (13% in group 1, 3.9% in group 2)
908 EVAR patients
Hertault A, Maurel B, Pontana F, et al. Benefits of Completion 3D Angiography Associated with Contrast Enhanced Ultrasound to Assess Technical Success after EVAR. European journal of vascular and endovascular surgery : the official journal of the European Society for Vascular Surgery. 2015;49(5):541-548.
Hertault A, Maurel B, Pontana F, et al
Benefits of Completion 3D Angiography Associated with Contrast Enhanced Ultrasound to Assess Technical Success after EVAR
2015
European journal of vascular and endovascular surgery: the official journal of the European Society for Vascular Surgery
4.061
Single-center prospective non-randomized trial with two arms based on imaging type (two time periods)
EVARs performed between Dec 2012 and July 2013, and between Oct 2013 and Apr 2014
30 day perioperative interval
Type I or III endoleaks requiring additional procedures
5.1% in group 1, 18.6% in group 2
133 patients (79 group 1, 54 group 2)
van Marrewijk C, Buth J, Harris PL, Norgren L, Nevelsteen A, Wyatt MG. Significance of endoleaks after endovascular repair of abdominal aortic aneurysms: The EUROSTAR experience. Journal of vascular surgery. 2002;35(3):461-473.
van Marrewijk C, Buth J, Harris PL, Norgren L, Nevelsteen A, Wyatt MG
Significance of endoleaks after endovascular repair of abdominal aortic aneurysms: The EUROSTAR experience
2002
Journal of vascular surgery
3.536
Prospective multi-center long-term data collection (some early patients enrolled retrospectively)
EVARs performed between Jul 1994 and Jul 2000
Mean follow-up 15.4 months
Any endoleak identified at 1 month or after
19.80%
2463 EVAR patients
Ryer EJ, Garvin RP, Thomas B, Kuivaniemi H, Franklin DP, Elmore JR. Patients with familial abdominal aortic aneurysms are at increased risk for endoleak and secondary intervention following elective endovascular aneurysm repair. Journal of vascular surgery. 2015.
Ryer EJ, Garvin RP, Thomas B, Kuivaniemi H, Franklin DP, Elmore JR
Patients with familial abdominal aortic aneurysms are at increased risk for endoleak and secondary intervention following elective endovascular aneurysm repair
2015
Journal of vascular surgery
3.536
Retrospective chart review, two-armed by AAA type
EVARs performed between Jan 2004 and Dec 2014
Mean follow-up 52 ± 33 months in familial group, 49 ± 31 in sporadic group
Any endoleak
24% in familial group, 12% in sporadic group
260 EVAR patients (55 in familial group, 205 in sporadic group)
Yamamoto K, Komori K, Banno H, Narita H, Kodama A, Sugimoto M. Validation of Patient Selection for Endovascular Aneurysm Repair or Open Repair of Abdominal Aortic Aneurysm- Single-Center Study. Circulation journal : official journal of the Japanese Circulation Society. 2015;79(8):1699-1705.
Yamamoto K, Komori K, Banno H, Narita H, Kodama A, Sugimoto M
Validation of Patient Selection for Endovascular Aneurysm Repair or Open Repair of Abdominal Aortic Aneurysm- Single-Center Study
2015
Circulation journal: official journal of the Japanese Circulation Society
3.544
Single-center retrospective observational study
EVARs performed between Jun 2007 and Apr 2014
Mean follow-up 26.5 months, range 3-130
Any type I or III Endoleak; Any type II endoleak
4.5% for I and III combined; 36% at 1 year for II, 41% at 5 years
426 EVAR patients
Huang Y, Gloviczki P, Oderich GS, et al. Outcome after open and endovascular repairs of abdominal aortic aneurysms in matched cohorts using propensity score modeling. Journal of vascular surgery. 2015;62(2):304-311 e302.
Huang Y, Gloviczki P, Oderich GS, et al
Outcome after open and endovascular repairs of abdominal aortic aneurysms in matched cohorts using propensity score modeling
2015
Journal of vascular surgery
3.536
Retrospective clinical data review
EVARS performed between 2000 and 2011
Median follow-up 7.6 years (range 31 days-13.1 years)
Any endoleak
19.60%
588 EVAR patients
Basoor A, Patel KC, Halabi AR, et al. Periprocedural and long-term outcomes of endovascular abdominal aortic aneurysm repair in cardiology practice. Catheterization and cardiovascular interventions : official journal of the Society for Cardiac Angiography & Interventions. 2014;84(7):1173-1179.
Basoor A, Patel KC, Halabi AR, et al
Periprocedural and long-term outcomes of endovascular abdominal aortic aneurysm repair in cardiology practice
2014
Catheterization and cardiovascular interventions: official journal of the Society for Cardiac Angiography & Interventions
2.602
Retrospective chart review
EVARs performed between Sept 2005 and Jan 2011
Mean follow-up 30 months (range 2-66)
Endoleak requiring reintervention
3.5% (6/170)
170 patients
Becquemin JP, Pillet JC, Lescalie F, et al. A randomized controlled trial of endovascular aneurysm repair versus open surgery for abdominal aortic aneurysms in low- to moderate-risk patients. Journal of vascular surgery. 2011;53(5):1167-1173 e1161.
Becquemin JP, Pillet JC, Lescalie F, et al
A randomized controlled trial of endovascular aneurysm repair versus open surgery for abdominal aortic aneurysms in low- to moderate-risk patients
2011
Journal of vascular surgery
3.536
Multi-center two-armed randomized clinical trial
EVARs performed between Mar 2003 and Mar 2008
Median follow-up 3 years (mean 2.5 ± 1.2 years, range 0-4.8)
Endoleak visible on CT scan
27%
163 EVAR patients

Secondary Vascular Intervention
Hertault A, Maurel B, Pontana F, et al. Benefits of Completion 3D Angiography Associated with Contrast Enhanced Ultrasound to Assess Technical Success after EVAR. European journal of vascular and endovascular surgery : the official journal of the European Society for Vascular Surgery. 2015;49(5):541-548.
Hertault A, Maurel B, Pontana F, et al
Benefits of Completion 3D Angiography Associated with Contrast Enhanced Ultrasound to Assess Technical Success after EVAR
2015
European journal of vascular and endovascular surgery: the official journal of the European Society for Vascular Surgery
4.061
Single-center prospective non-randomized trial with two arms based on imaging type (two time periods)
EVARs performed between Dec 2012 and July 2013, and between Oct 2013 and Apr 2014
30 day perioperative interval
Any early reinterventions
3.8% in group 1, 3.7% in group 2
133 patients (79 group 1, 54 group 2)
Ryer EJ, Garvin RP, Thomas B, Kuivaniemi H, Franklin DP, Elmore JR. Patients with familial abdominal aortic aneurysms are at increased risk for endoleak and secondary intervention following elective endovascular aneurysm repair. Journal of vascular surgery. 2015.
Ryer EJ, Garvin RP, Thomas B, Kuivaniemi H, Franklin DP, Elmore JR
Patients with familial abdominal aortic aneurysms are at increased risk for endoleak and secondary intervention following elective endovascular aneurysm repair
2015
Journal of vascular surgery
3.536
Retrospective chart review, two-armed by AAA type
EVARs performed between Jan 2004 and Dec 2014
Mean follow-up 52 ± 33 months in familial group, 49 ± 31 in sporadic group
Proximal stent/cuff, limb extension, embolization, converstion to open, or ischemia
21% in familial group, 12% in sporadic group
260 EVAR patients (55 in familial group, 205 in sporadic group)
van Marrewijk C, Buth J, Harris PL, Norgren L, Nevelsteen A, Wyatt MG. Significance of endoleaks after endovascular repair of abdominal aortic aneurysms: The EUROSTAR experience. Journal of vascular surgery. 2002;35(3):461-473.
van Marrewijk C, Buth J, Harris PL, Norgren L, Nevelsteen A, Wyatt MG
Significance of endoleaks after endovascular repair of abdominal aortic aneurysms: The EUROSTAR experience
2002
Journal of vascular surgery
3.536
Prospective multi-center long-term data collection (some early patients enrolled retrospectively)
EVARs performed between Jul 1994 and Jul 2000
Mean follow-up 15.4 months
Any reintervention
13%
2463 EVAR patients
Garg T, Baker LC, Mell MW. Postoperative Surveillance and Long-term Outcomes After Endovascular Aneurysm Repair Among Medicare Beneficiaries. JAMA surgery. 2015.
Garg T, Baker LC, Mell MW
Postoperative Surveillance and Long-term Outcomes After Endovascular Aneurysm Repair Among Medicare Beneficiaries
2015
JAMA surgery
7.956
Retrospective Medicare database analysis, two-armed by surveillance level
EVARs performed between Jan 2002 and Dec 2005
Mean follow-up 5.2 ± 2.9 years
Any minor or major reintervention
6.2% in complete surveillance cohort; 1.2% in incomplete surveillance cohort
7888 EVAR patients (3944 in each cohort)
Yamamoto K, Komori K, Banno H, Narita H, Kodama A, Sugimoto M. Validation of Patient Selection for Endovascular Aneurysm Repair or Open Repair of Abdominal Aortic Aneurysm- Single-Center Study. Circulation journal : official journal of the Japanese Circulation Society. 2015;79(8):1699-1705.
Yamamoto K, Komori K, Banno H, Narita H, Kodama A, Sugimoto M
Validation of Patient Selection for Endovascular Aneurysm Repair or Open Repair of Abdominal Aortic Aneurysm- Single-Center Study
2015
Circulation journal: official journal of the Japanese Circulation Society
3.544
Single-center retrospective observational study
EVARs performed between Jun 2007 and Apr 2014
Mean follow-up 26.5 months, range 3-130
Any reintervention
25%
426 EVAR patients
Huang Y, Gloviczki P, Oderich GS, et al. Outcome after open and endovascular repairs of abdominal aortic aneurysms in matched cohorts using propensity score modeling. Journal of vascular surgery. 2015;62(2):304-311 e302.
Huang Y, Gloviczki P, Oderich GS, et al
Outcome after open and endovascular repairs of abdominal aortic aneurysms in matched cohorts using propensity score modeling
2015
Journal of vascular surgery
3.536
Retrospective clinical data review
EVARS performed between 2000 and 2011
Median follow-up 7.6 years (range 31 days-13.1 years)
Any reintervention or conversion to open
26%
588 EVAR patients
Basoor A, Patel KC, Halabi AR, et al. Periprocedural and long-term outcomes of endovascular abdominal aortic aneurysm repair in cardiology practice. Catheterization and cardiovascular interventions : official journal of the Society for Cardiac Angiography & Interventions. 2014;84(7):1173-1179.
Basoor A, Patel KC, Halabi AR, et al
Periprocedural and long-term outcomes of endovascular abdominal aortic aneurysm repair in cardiology practice
2014
Catheterization and cardiovascular interventions: official journal of the Society for Cardiac Angiography & Interventions
2.602
Retrospective chart review
EVARs performed between Sept 2005 and Jan 2011
Mean follow-up 30 months (range 2-66)
Secondary conversion to open
.6% (1/170)
170 patients
Becquemin JP, Pillet JC, Lescalie F, et al. A randomized controlled trial of endovascular aneurysm repair versus open surgery for abdominal aortic aneurysms in low- to moderate-risk patients. Journal of vascular surgery. 2011;53(5):1167-1173 e1161.
Becquemin JP, Pillet JC, Lescalie F, et al
A randomized controlled trial of endovascular aneurysm repair versus open surgery for abdominal aortic aneurysms in low- to moderate-risk patients
2011
Journal of vascular surgery
3.536
Multi-center two-armed randomized clinical trial
EVARs performed between Mar 2003 and Mar 2008
Median follow-up 3 years (mean 2.5 ± 1.2 years, range 0-4.8)
Any vascular reintervention, including graft replacement, endoleak repair, occulision, or stenoses
16%
163 EVAR patients

Online Table 4: POP Mesh
 
Citation
Author(s)
Title

Year
Journal
Impact Factor
Study Design
Time period
Time Span
Target Performance Values
Anterior/ Posterior
Mesh/ Non-Mesh
Results
Sample Size
Lamblin G, Van-Nieuwenhuyse A, Chabert P, Lebail-Carval K, Moret S, Mellier G. A randomized controlled trial comparing anatomical and functional outcome between vaginal colposuspension and transvaginal mesh. International urogynecology journal. 2014;25(7):961-970.
Lamblin G, Van-Nieuwenhuyse A, Chabert P, Lebail-Carval K, Moret S, Mellier G
A randomized controlled trial comparing anatomical and functional outcome between vaginal colposuspension and transvaginal mesh
2014
International urogynecology journal
1.937
Single-center prospective randomized controlled trial
Surgery performed between Sept 2008 and Jun 2011
Follow-up conducted at 3, 12, and 24 months
Mesh exposure
Anterior
Mesh
6% at 2 years
33
Marschke J, Hengst L, Schwertner-Tiepelmann N, Beilecke K, Tunn R. Transvaginal single-incision mesh reconstruction for recurrent or advanced anterior vaginal wall prolapse. Archives of gynecology and obstetrics. 2015;291(5):1081-1087.
Marschke J, Hengst L, Schwertner-Tiepelmann N, Beilecke K, Tunn R
Transvaginal single-incision mesh reconstruction for recurrent or advanced anterior vaginal wall prolapse
2015
Archives of gynecology and obstetrics
2.09
Single-center retrospective review with follow-up
Surgery performed 2009-2010
Mean follow-up 13 months
Mesh erosion
Anterior
Mesh
5.70%
70
Withagen MI, Vierhout ME, Hendriks JC, Kluivers KB, Milani AL. Risk factors for exposure, pain, and dyspareunia after tension-free vaginal mesh procedure. Obstetrics and gynecology. 2011;118(3):629-636.
Withagen MI, Vierhout ME, Hendriks JC, Kluivers KB, Milani AL
Risk factors for exposure, pain, and dyspareunia after tension-free vaginal mesh procedure
2011
Obstetrics and gynecology
5.426
Prospective observational cohort study
Surgery performed between Sept 2005 and Dec 2009
Follow-up conducted at 6 weeks, 6 months, and 12 months
Mesh exposure (any visible or palpable mesh)
Both included
Mesh
12%
294
de Landsheere L, Ismail S, Lucot JP, Deken V, Foidart JM, Cosson M. Surgical intervention after transvaginal Prolift mesh repair: retrospective single-center study including 524 patients with 3 years' median follow-up. American journal of obstetrics and gynecology. 2012;206(1):83 e81-87.
de Landsheere L, Ismail S, Lucot JP, Deken V, Foidart JM, Cosson M
Surgical intervention after transvaginal Prolift mesh repair: retrospective single-center study including 524 patients with 3 years' median follow-up
2012
American journal of obstetrics and gynecology
5.574
Retrospective cohort study
Surgery performed between Jan 2005 and Jan 2009
Median follow-up 38 months (range 15-63)
Exposure requiring reoperation
Both included
Mesh
2.50%
524
Costantini E, Zucchi A, Lazzeri M, Del Zingaro M, Vianello A, Porena M. Managing mesh erosion after abdominal pelvic organ prolapse repair: ten years' experience in a single center. Urologia internationalis. 2011;86(4):419-423.
Costantini E, Zucchi A, Lazzeri M, Del Zingaro M, Vianello A, Porena M
Managing mesh erosion after abdominal pelvic organ prolapse repair: ten years' experience in a single center
2011
Urologia internationalis
1.611
Single-center retrospective review
Surgery performed between Jan 1998 and Dec 2008
Mean follow-up 57 months (range 18-120)
Erosion requiring treatment
Both included
Mesh
6.70%
179
Rogowski A, Bienkowski P, Tarwacki D, et al. Retrospective comparison between the Prolift and Elevate anterior vaginal mesh procedures: 18-month clinical outcome. International urogynecology journal. 2015.
Rogowski A, Bienkowski P, Tarwacki D, et al
Retrospective comparison between the Prolift and Elevate anterior vaginal mesh procedures: 18-month clinical outcome
2015
International urogynecology journal
1.937
Retrospective cohort study of two types of mesh kit
Surgery performed between Jan 2011 and Dec 2012
Mean follow-up 18 ± 2 months
Mesh exposure
Anterior
Mesh
7.7% Prolift group, 0% Elevate group
114 (Prolift group 52, Elevate group 62)
Nieminen K, Hiltunen R, Heiskanen E, et al. Symptom resolution and sexual function after anterior vaginal wall repair with or without polypropylene mesh. International urogynecology journal and pelvic floor dysfunction. 2008;19(12):1611-1616.
Nieminen K, Hiltunen R, Heiskanen E, et al
Symptom resolution and sexual function after anterior vaginal wall repair with or without polypropylene mesh
2008
International urogynecology journal and pelvic floor dysfunction
1.51
Multi-center prospective randomized clinical trial
Not reported
Follow-up conducted at 2, 12, and 24 months
Mesh exposure
Anterior
Mesh
8%
105
31st Annual IUGA Meeting, Athens, Greece, 6-9 September 2006. Abstracts. International urogynecology journal and pelvic floor dysfunction. 2006;17 Suppl 2:S57-359.
Ali S, Han HC, Lee LC
Abstracts from the 31st Annual IUGA Meeting, Athens, Greece, 6-9 September 2006
2006
International urogynecology journal and pelvic floor dysfunction
1.51
Prospective randomized cohort study
Surgery performed between Feb 2004 and Jul 2005
Follow-up conducted at 6 months
Mesh erosion
Anterior
Mesh
6.50%
46
Sivaslioglu AA, Unlubilgin E, Dolen I. A randomized comparison of polypropylene mesh surgery with site-specific surgery in the treatment of cystocoele. International urogynecology journal and pelvic floor dysfunction. 2008;19(4):467-471.
Sivaslioglu AA, Unlubilgin E, Dolen I
A randomized comparison of polypropylene mesh surgery with site-specific surgery in the treatment of cystocoele
2008
International urogynecology journal and pelvic floor dysfunction
1.51
Single-center prospective randomized controlled trial
Surgery performed between Jan 2006 and Jan 2007
Mean follow-up 12 months (range 8-16 months)
Mesh erosion
Anterior
Mesh
6.90%
43
Abstracts from the Joint Meeting of the International Continence Society and the International Urogynecological Association. Toronto, Canada. August 23-27, 2010. International urogynecology journal. 2010;21 Suppl 1:S1-428.
Thijs S, Deprest J, De Ridder D, Claerhout F, Roovers J
Abstracts from the Joint Meeting of the International Continence Society and the International Urogynecological Association, Toroto Cand  a,August 23-27, 2010
2010
International urogynecology journal
1.937
Multi-center prospective randomized clinical trial
Surgery performed between Jan 2006 and Apr 2009
Follow-up conducted at 6 weeks, 6 months, and 12 months
Mesh erosion
Anterior
Mesh
19%; 8% required reoperation
48
Vollebregt A, Fischer K, Gietelink D, van der Vaart CH. Primary surgical repair of anterior vaginal prolapse: a randomised trial comparing anatomical and functional outcome between anterior colporrhaphy and trocar-guided transobturator anterior mesh. BJOG : an international journal of obstetrics and gynaecology. 2011;118(12):1518-1527.
Vollebregt A, Fischer K, Gietelink D, van der Vaart CH
Primary surgical repair of anterior vaginal prolapse: a randomised trial comparing anatomical and functional outcome between anterior colporrhaphy and trocar-guided transobturator anterior mesh
2011
BJOG: an international journal of obstetrics and gynaecology
5.051
Multi-center prospective randomized clinical trial
Surgery performed between Jun 2007 and May 2009
Mean follow-up 12 months
Mesh exposure
Posterior
Mesh
4%
56
Nguyen JN, Burchette RJ. Outcome after anterior vaginal prolapse repair: a randomized controlled trial. Obstetrics and gynecology. 2008;111(4):891-898.
Nguyen JN, Burchette RJ
Outcome after anterior vaginal prolapse repair: a randomized controlled trial
2008
Obstetrics and gynecology
5.426
Single-center prospective randomized controlled trial
Surgery performed between Jan 2005 and Apr 2006
Follow-up conducted at 8 weeks, 6 months, and 1 year
Mesh extrusion
Anterior
Mesh
5%
37
Menefee SA, Dyer KY, Lukacz ES, Simsiman AJ, Luber KM, Nguyen JN. Colporrhaphy compared with mesh or graft-reinforced vaginal paravaginal repair for anterior vaginal wall prolapse: a randomized controlled trial. Obstetrics and gynecology. 2011;118(6):1337-1344.
Menefee SA, Dyer KY, Lukacz ES, Simsiman AJ, Luber KM, Nguyen JN
Colporrhaphy compared with mesh or graft-reinforced vaginal paravaginal repair for anterior vaginal wall prolapse: a randomized controlled trial
2011
Obstetrics and gynecology
5.426
Single-center prospective randomized controlled trial, three-armed (porcine graft cohort not reported here)
Surgery performed between Jan 2006 and Sept 2008
Minimum 2 years follow-up
Mesh erosion
Anterior
Mesh
14% at 2 years
28
Carey M, Higgs P, Goh J, et al. Vaginal repair with mesh versus colporrhaphy for prolapse: a randomised controlled trial. BJOG : an international journal of obstetrics and gynaecology. 2009;116(10):1380-1386.
Carey M, Higgs P, Goh J, et al
Vaginal repair with mesh versus colporrhaphy for prolapse: a randomised controlled trial
2009
BJOG: an international journal of obstetrics and gynaecology
5.051
Single-center prospective randomized controlled trial
Surgery performed between Feb 2003 and Aug 2005
Minimum 12 months follow-up
Mesh erosion
Both
Mesh
5.60%
63

Reoperation
Kelly EC, Winick-Ng J, Welk B. Surgeon Experience and Complications of Transvaginal Prolapse Mesh. Obstetrics and gynecology. 2016.
Kelly EC, Winick-Ng J, Welk B
Surgeon Experience and Complications of Transvaginal Prolapse Mesh
2016
Obstetrics and gynecology
5.426
Retrospective, population-based cohort study
Surgery performed between 2002-2013
Median follow-up 5.4 years (IQR 3.0-8.0)
Surgical revision of mesh
Both included
Mesh
5% within 10 years
5,488
Chughtai B, Mao J, Buck J, Kaplan S, Sedrakyan A. Use and risks of surgical mesh for pelvic organ prolapse surgery in women in New York state: population based cohort study. Bmj. 2015;350:h2685.
Chughtai B, Mao J, Buck J, Kaplan S, Sedrakyan A
Use and risks of surgical mesh for pelvic organ prolapse surgery in women in New York state: population based cohort study
2015
BMJ
20.785
Retrospective population-based cohort study
Surgery performed between 2008-2011
Mean follow-up 45.1 weeks
Any surgical reintervention
Both included
Mesh
3.3% within 1 year
7,338
Chughtai B, Mao J, Buck J, Kaplan S, Sedrakyan A. Use and risks of surgical mesh for pelvic organ prolapse surgery in women in New York state: population based cohort study. Bmj. 2015;350:h2685.
Chughtai B, Mao J, Buck J, Kaplan S, Sedrakyan A
Use and risks of surgical mesh for pelvic organ prolapse surgery in women in New York state: population based cohort study
2015
BMJ
20.785
Retrospective population-based cohort study
Surgery performed between 2008-2012
Mean follow-up 45.1 weeks
Any surgical reintervention
Both included
Non-mesh
2.2% within 1 year
20,653
Sokol AI, Iglesia CB, Kudish BI, et al. One-year objective and functional outcomes of a randomized clinical trial of vaginal mesh for prolapse. American journal of obstetrics and gynecology. 2012;206(1):86 e81-89.
Sokol AI, Iglesia CB, Kudish BI, et al
One-year objective and functional outcomes of a randomized clinical trial of vaginal mesh for prolapse
2012
American journal of obstetrics and gynecology
5.574
Multi-center prospective double-blind randomized clinical trial
Surgery performed between Jan 2007 and Aug 2009
Minimum 12 months follow-up required, mean 13.2 ± 4.7 months
Reoperation for prolapse or mesh erosion
Both included
Mesh
15.60%
27
Kapoor DS, Nemcova M, Pantazis K, Brockman P, Bombieri L, Freeman RM. Reoperation rate for traditional anterior vaginal repair: analysis of 207 cases with a median 4-year follow-up. International urogynecology journal. 2010;21(1):27-31.
Kapoor DS, Nemcova M, Pantazis K, Brockman P, Bombieri L, Freeman RM
Reoperation rate for traditional anterior vaginal repair: analysis of 207 cases with a median 4-year follow-up
2010
nternational urogynecology journal
1.937
Single-center retrospective case note review
Surgery performed between 2000-2005
Median 50 months follow-up
Reoperation for recurrent cystocele
Anterior
Non-mesh
3.40%
207
Jonsson Funk M, Visco AG, Weidner AC, Pate V, Wu JM. Long-term outcomes of vaginal mesh versus native tissue repair for anterior vaginal wall prolapse. International urogynecology journal. 2013;24(8):1279-1285.
Jonsson Funk M, Visco AG, Weidner AC, Pate V, Wu JM
Long-term outcomes of vaginal mesh versus native tissue repair for anterior vaginal wall prolapse
2013
International urogynecology journal
1.937
Retrospective review of longitudinal healthcare claims data
Surgery performed between 2005-2010
5-year cumulative risk calculated using large data
Repeat surgery for anterior or apical prolapse or for mesh removal/revision
Anterior
Mesh
15.20%
6,871
Jonsson Funk M, Visco AG, Weidner AC, Pate V, Wu JM. Long-term outcomes of vaginal mesh versus native tissue repair for anterior vaginal wall prolapse. International urogynecology journal. 2013;24(8):1279-1285.
Jonsson Funk M, Visco AG, Weidner AC, Pate V, Wu JM
Long-term outcomes of vaginal mesh versus native tissue repair for anterior vaginal wall prolapse
2013
International urogynecology journal
1.937
Retrospective review of longitudinal healthcare claims data
Surgery performed between 2005-2011
5-year cumulative risk calculated using large data
Repeat surgery for anterior or apical prolapse or for mesh removal/revision
Anterior
Non-mesh
9.80%
20,938
Altman D, Vayrynen T, Engh ME, Axelsen S, Falconer C, Nordic Transvaginal Mesh G. Anterior colporrhaphy versus transvaginal mesh for pelvic-organ prolapse. The New England journal of medicine. 2011;364(19):1826-1836.
Altman D, Vayrynen T, Engh ME, Axelsen S, Falconer C, Nordic Transvaginal Mesh G
Anterior colporrhaphy versus transvaginal mesh for pelvic-organ prolapse
2011
The New England journal of medicine
72.406
Multi-center parallel-group randomized controlled trial
Surgery performed between Dec 2007 and Dec 2008
Follow-up conducted at 2 months and 1 year
Surgery for mesh exposure or stress incontinence
Anterior
Mesh
3.2% exposure, 2.7% incontinence
186
Altman D, Vayrynen T, Engh ME, Axelsen S, Falconer C, Nordic Transvaginal Mesh G. Anterior colporrhaphy versus transvaginal mesh for pelvic-organ prolapse. The New England journal of medicine. 2011;364(19):1826-1836.
Altman D, Vayrynen T, Engh ME, Axelsen S, Falconer C, Nordic Transvaginal Mesh G
Anterior colporrhaphy versus transvaginal mesh for pelvic-organ prolapse
2011
The New England journal of medicine
72.406
Multi-center parallel-group randomized controlled trial
Surgery performed between Dec 2007 and Dec 2008
Follow-up conducted at 2 months and 1 year
Surgery for prolapse recurrence
Anterior
Non-mesh
0.50%
182

Recurrence
Delroy CA, Castro Rde A, Dias MM, et al. The use of transvaginal synthetic mesh for anterior vaginal wall prolapse repair: a randomized controlled trial. International urogynecology journal. 2013;24(11):1899-1907.
Delroy CA, Castro Rde A, Dias MM, et al
The use of transvaginal synthetic mesh for anterior vaginal wall prolapse repair: a randomized controlled trial
2013
International urogynecology journal
1.937
Single-center prospective randomized controlled trial
Surgery performed between Jan 2007 and Jan 2009
Follow-up conducted at 1 year
POP stage II≤ considered recurrence
Anterior
Mesh
17.5% recurrence at 1 year
40
Delroy CA, Castro Rde A, Dias MM, et al. The use of transvaginal synthetic mesh for anterior vaginal wall prolapse repair: a randomized controlled trial. International urogynecology journal. 2013;24(11):1899-1907.
Delroy CA, Castro Rde A, Dias MM, et al
The use of transvaginal synthetic mesh for anterior vaginal wall prolapse repair: a randomized controlled trial
2013
International urogynecology journal
1.937
Single-center prospective randomized controlled trial
Surgery performed between Jan 2007 and Jan 2010
Follow-up conducted at 1 year
POP stage II≤ considered recurrence
Anterior
Non-mesh
43.7% recurrence at 1 year
39
Lamblin G, Van-Nieuwenhuyse A, Chabert P, Lebail-Carval K, Moret S, Mellier G. A randomized controlled trial comparing anatomical and functional outcome between vaginal colposuspension and transvaginal mesh. International urogynecology journal. 2014;25(7):961-970.
Lamblin G, Van-Nieuwenhuyse A, Chabert P, Lebail-Carval K, Moret S, Mellier G
A randomized controlled trial comparing anatomical and functional outcome between vaginal colposuspension and transvaginal mesh
2014
International urogynecology journal
1.937
Single-center prospective randomized controlled trial
Surgery performed between Sept 2008 and Jun 2011
Follow-up conducted at 3, 12, and 24 months
POP stage II≤ considered recurrence
Anterior
Mesh
0% at 2 years
33
Lamblin G, Van-Nieuwenhuyse A, Chabert P, Lebail-Carval K, Moret S, Mellier G. A randomized controlled trial comparing anatomical and functional outcome between vaginal colposuspension and transvaginal mesh. International urogynecology journal. 2014;25(7):961-970.
Lamblin G, Van-Nieuwenhuyse A, Chabert P, Lebail-Carval K, Moret S, Mellier G
A randomized controlled trial comparing anatomical and functional outcome between vaginal colposuspension and transvaginal mesh
2014
International urogynecology journal
1.937
Single-center prospective randomized controlled trial
Surgery performed between Sept 2008 and Jun 2011
Follow-up conducted at 3, 12, and 24 months
POP stage II≤ considered recurrence
Anterior
Non-mesh
15.6% at 2 years
35
Withagen MI, Vierhout ME, Hendriks JC, Kluivers KB, Milani AL. Risk factors for exposure, pain, and dyspareunia after tension-free vaginal mesh procedure. Obstetrics and gynecology. 2011;118(3):629-636.
Withagen MI, Vierhout ME, Hendriks JC, Kluivers KB, Milani AL
Risk factors for exposure, pain, and dyspareunia after tension-free vaginal mesh procedure
2011
Obstetrics and gynecology
5.426
Prospective observational cohort study
Surgery performed between Sept 2005 and Dec 2009
Follow-up conducted at 6 weeks, 6 months, and 12 months
POP stage II≤ considered recurrence
Both included
Mesh
13%
294
Sokol AI, Iglesia CB, Kudish BI, et al. One-year objective and functional outcomes of a randomized clinical trial of vaginal mesh for prolapse. American journal of obstetrics and gynecology. 2012;206(1):86 e81-89.
Sokol AI, Iglesia CB, Kudish BI, et al
One-year objective and functional outcomes of a randomized clinical trial of vaginal mesh for prolapse
2012
American journal of obstetrics and gynecology
5.574
Multi-center prospective double-blind randomized clinical trial
Surgery performed between Jan 2007 and Aug 2009
Minimum 12 months follow-up required, mean 13.2 ± 4.7 months
POP stage II≤ considered recurrence
Both included
Mesh
62.50%
27
Sokol AI, Iglesia CB, Kudish BI, et al. One-year objective and functional outcomes of a randomized clinical trial of vaginal mesh for prolapse. American journal of obstetrics and gynecology. 2012;206(1):86 e81-89.
Sokol AI, Iglesia CB, Kudish BI, et al
One-year objective and functional outcomes of a randomized clinical trial of vaginal mesh for prolapse
2013
American journal of obstetrics and gynecology
5.574
Multi-center prospective double-blind randomized clinical trial
Surgery performed between Jan 2007 and Aug 2010
Minimum 12 months follow-up required, mean 16.2 ± 5.4 months
POP stage II≤ considered recurrence
Both included
Non-mesh
69.70%
33
Tamanini JT, de Oliveira Souza Castro RC, Tamanini JM, Castro RA, Sartori MG, Girao MJ. A prospective, randomized, controlled trial of the treatment of anterior vaginal wall prolapse: medium term followup. The Journal of urology. 2015;193(4):1298-1304.
Tamanini JT, de Oliveira Souza Castro RC, Tamanini JM, Castro RA, Sartori MG, Girao MJ
A prospective, randomized, controlled trial of the treatment of anterior vaginal wall prolapse: medium term followup
2015
The Journal of urology
5.157
Single-center prospective randomized controlled trial
Surgery performed between Feb 2008 and Dec 2010
Follow-up conducted at 1 and 2 years
POP stage II≤ considered recurrence
Anterior
Mesh
23.8% at 2 years
45
Tamanini JT, de Oliveira Souza Castro RC, Tamanini JM, Castro RA, Sartori MG, Girao MJ. A prospective, randomized, controlled trial of the treatment of anterior vaginal wall prolapse: medium term followup. The Journal of urology. 2015;193(4):1298-1304.
Tamanini JT, de Oliveira Souza Castro RC, Tamanini JM, Castro RA, Sartori MG, Girao MJ
A prospective, randomized, controlled trial of the treatment of anterior vaginal wall prolapse: medium term followup
2016
The Journal of urology
6.157
Single-center prospective randomized controlled trial
Surgery performed between Feb 2008 and Dec 2011
Follow-up conducted at 1 and 2 years
POP stage II≤ considered recurrence
Anterior
Non-mesh
36% at 2 years
55
Kapoor DS, Nemcova M, Pantazis K, Brockman P, Bombieri L, Freeman RM. Reoperation rate for traditional anterior vaginal repair: analysis of 207 cases with a median 4-year follow-up. International urogynecology journal. 2010;21(1):27-31.
Kapoor DS, Nemcova M, Pantazis K, Brockman P, Bombieri L, Freeman RM
Reoperation rate for traditional anterior vaginal repair: analysis of 207 cases with a median 4-year follow-up
2010
nternational urogynecology journal
1.937
Single-center retrospective case note review
Surgery performed between 2000-2005
Median 50 months follow-up
POP stage II≤ considered recurrence
Anterior
Non-mesh
12%
207
Chmielewski L, Walters MD, Weber AM, Barber MD. Reanalysis of a randomized trial of 3 techniques of anterior colporrhaphy using clinically relevant definitions of success. American journal of obstetrics and gynecology. 2011;205(1):69 e61-68.
Chmielewski L, Walters MD, Weber AM, Barber MD
Reanalysis of a randomized trial of 3 techniques of anterior colporrhaphy using clinically relevant definitions of success
2011
American journal of obstetrics and gynecology
5.574
Reanalysis of single-center prospective randomized trial
Surgery performed between Jun 1996 and Jan 2001
Median 26 months follow-up
No feeling of bulging or prolapse beyond the hymen considered success
Anterior
Mesh
12%
27
Chmielewski L, Walters MD, Weber AM, Barber MD. Reanalysis of a randomized trial of 3 techniques of anterior colporrhaphy using clinically relevant definitions of success. American journal of obstetrics and gynecology. 2011;205(1):69 e61-68.
Chmielewski L, Walters MD, Weber AM, Barber MD
Reanalysis of a randomized trial of 3 techniques of anterior colporrhaphy using clinically relevant definitions of success
2011
American journal of obstetrics and gynecology
5.574
Reanalysis of single-center prospective randomized trial
Surgery performed between Jun 1996 and Jan 2001
Median 26 months follow-up
No feeling of bulging or prolapse beyond the hymen considered success
Anterior
Non-mesh
11%
32
Carey M, Higgs P, Goh J, et al. Vaginal repair with mesh versus colporrhaphy for prolapse: a randomised controlled trial. BJOG : an international journal of obstetrics and gynaecology. 2009;116(10):1380-1386.
Carey M, Higgs P, Goh J, et al
Vaginal repair with mesh versus colporrhaphy for prolapse: a randomised controlled trial
2009
BJOG: an international journal of obstetrics and gynaecology
5.051
Single-center prospective randomized controlled trial
Surgery performed between Feb 2003 and Aug 2005
Minimum 12 months follow-up
POP stage II≤ considered recurrence
Both
Mesh
19%
63
Carey M, Higgs P, Goh J, et al. Vaginal repair with mesh versus colporrhaphy for prolapse: a randomised controlled trial. BJOG : an international journal of obstetrics and gynaecology. 2009;116(10):1380-1386.
Carey M, Higgs P, Goh J, et al
Vaginal repair with mesh versus colporrhaphy for prolapse: a randomised controlled trial
2009
BJOG: an international journal of obstetrics and gynaecology
5.051
Single-center prospective randomized controlled trial
Surgery performed between Feb 2003 and Aug 2005
Minimum 12 months follow-up
POP stage II≤ considered recurrence
Both
Non-mesh
34.40%
61
Marschke J, Hengst L, Schwertner-Tiepelmann N, Beilecke K, Tunn R. Transvaginal single-incision mesh reconstruction for recurrent or advanced anterior vaginal wall prolapse. Archives of gynecology and obstetrics. 2015;291(5):1081-1087.
Marschke J, Hengst L, Schwertner-Tiepelmann N, Beilecke K, Tunn R
Transvaginal single-incision mesh reconstruction for recurrent or advanced anterior vaginal wall prolapse
2015
Archives of gynecology and obstetrics
2.09
Single-center retrospective review with follow-up
Surgery performed 2009-2010
Mean follow-up 13 months
POP stage II≤ considered recurrence
Anterior
Mesh
3.20%
70
Maher CF, Feiner B, DeCuyper EM, Nichlos CJ, Hickey KV, O'Rourke P. Laparoscopic sacral colpopexy versus total vaginal mesh for vaginal vault prolapse: a randomized trial. American journal of obstetrics and gynecology. 2011;204(4):360 e361-367.
Maher CF, Feiner B, DeCuyper EM, Nichlos CJ, Hickey KV, O'Rourke P
Laparoscopic sacral colpopexy versus total vaginal mesh for vaginal vault prolapse: a randomized trial
2011
American journal of obstetrics and gynecology
5.574
Single-center prospective randomized controlled trial
Surgery performed between Dec 2005 and Dec 2007
Follow-up conducted at 6, 12, and 30 months
POP stage II≤ considered recurrence
Both included
Mesh
57% at 2 years
55
Maher CF, Feiner B, DeCuyper EM, Nichlos CJ, Hickey KV, O'Rourke P. Laparoscopic sacral colpopexy versus total vaginal mesh for vaginal vault prolapse: a randomized trial. American journal of obstetrics and gynecology. 2011;204(4):360 e361-367.
Maher CF, Feiner B, DeCuyper EM, Nichlos CJ, Hickey KV, O'Rourke P
Laparoscopic sacral colpopexy versus total vaginal mesh for vaginal vault prolapse: a randomized trial
2012
American journal of obstetrics and gynecology
6.574
Single-center prospective randomized controlled trial
Surgery performed between Dec 2005 and Dec 2008
Follow-up conducted at 6, 12, and 30 months
POP stage II≤ considered recurrence
Both included
Non-mesh
23% at 2 years
53
Altman D, Vayrynen T, Engh ME, Axelsen S, Falconer C, Nordic Transvaginal Mesh G. Anterior colporrhaphy versus transvaginal mesh for pelvic-organ prolapse. The New England journal of medicine. 2011;364(19):1826-1836.
Altman D, Vayrynen T, Engh ME, Axelsen S, Falconer C, Nordic Transvaginal Mesh G
Anterior colporrhaphy versus transvaginal mesh for pelvic-organ prolapse
2011
The New England journal of medicine
72.406
Multi-center parallel-group randomized controlled trial
Surgery performed between Dec 2007 and Dec 2008
Follow-up conducted at 2 months and 1 year
POP stage II≤ and/or a feeling of vaginal bulging considered recurrence
Anterior
Mesh
39.2% at 1 year
186
Altman D, Vayrynen T, Engh ME, Axelsen S, Falconer C, Nordic Transvaginal Mesh G. Anterior colporrhaphy versus transvaginal mesh for pelvic-organ prolapse. The New England journal of medicine. 2011;364(19):1826-1836.
Altman D, Vayrynen T, Engh ME, Axelsen S, Falconer C, Nordic Transvaginal Mesh G
Anterior colporrhaphy versus transvaginal mesh for pelvic-organ prolapse
2011
The New England journal of medicine
72.406
Multi-center parallel-group randomized controlled trial
Surgery performed between Dec 2007 and Dec 2008
Follow-up conducted at 2 months and 1 year
POP stage II≤ and/or a feeling of vaginal bulging considered recurrence
Anterior
Non-mesh
65.5% at 1 year
182
El-Nazer MA, Gomaa IA, Ismail Madkour WA, Swidan KH, El-Etriby MA. Anterior colporrhaphy versus repair with mesh for anterior vaginal wall prolapse: a comparative clinical study. Archives of gynecology and obstetrics. 2012;286(4):965-972.
El-Nazer MA, Gomaa IA, Ismail Madkour WA, Swidan KH, El-Etriby MA
Anterior colporrhaphy versus repair with mesh for anterior vaginal wall prolapse: a comparative clinical study
2012
Archives of gynecology and obstetrics
2.09
Single-center prospective randomized controlled trial
Surgery performed between Nov 2005 and Nov 2007
Mean follow-up 24 months
POP stage II≤ considered recurrence
Anterior
Mesh
5%
20
El-Nazer MA, Gomaa IA, Ismail Madkour WA, Swidan KH, El-Etriby MA. Anterior colporrhaphy versus repair with mesh for anterior vaginal wall prolapse: a comparative clinical study. Archives of gynecology and obstetrics. 2012;286(4):965-972.
El-Nazer MA, Gomaa IA, Ismail Madkour WA, Swidan KH, El-Etriby MA
Anterior colporrhaphy versus repair with mesh for anterior vaginal wall prolapse: a comparative clinical study
2012
Archives of gynecology and obstetrics
2.09
Single-center prospective randomized controlled trial
Surgery performed between Nov 2005 and Nov 2007
Mean follow-up 24 months
POP stage II≤ considered recurrence
Anterior
Non-mesh
15%
20
Vollebregt A, Fischer K, Gietelink D, van der Vaart CH. Primary surgical repair of anterior vaginal prolapse: a randomised trial comparing anatomical and functional outcome between anterior colporrhaphy and trocar-guided transobturator anterior mesh. BJOG : an international journal of obstetrics and gynaecology. 2011;118(12):1518-1527.
Vollebregt A, Fischer K, Gietelink D, van der Vaart CH
Primary surgical repair of anterior vaginal prolapse: a randomised trial comparing anatomical and functional outcome between anterior colporrhaphy and trocar-guided transobturator anterior mesh
2011
BJOG: an international journal of obstetrics and gynaecology
5.051
Multi-center prospective randomized clinical trial
Surgery performed between Jun 2007 and May 2009
Mean follow-up 12 months
POP stage II≤ considered recurrence
Anterior
Mesh
9% at 1 year
56
Vollebregt A, Fischer K, Gietelink D, van der Vaart CH. Primary surgical repair of anterior vaginal prolapse: a randomised trial comparing anatomical and functional outcome between anterior colporrhaphy and trocar-guided transobturator anterior mesh. BJOG : an international journal of obstetrics and gynaecology. 2011;118(12):1518-1527.
Vollebregt A, Fischer K, Gietelink D, van der Vaart CH
Primary surgical repair of anterior vaginal prolapse: a randomised trial comparing anatomical and functional outcome between anterior colporrhaphy and trocar-guided transobturator anterior mesh
2011
BJOG: an international journal of obstetrics and gynaecology
5.051
Multi-center prospective randomized clinical trial
Surgery performed between Jun 2007 and May 2009
Mean follow-up 12 months
POP stage II≤ considered recurrence
Anterior
Non-mesh
59% at 1 year; 5% required reoperation
58
Nguyen JN, Burchette RJ. Outcome after anterior vaginal prolapse repair: a randomized controlled trial. Obstetrics and gynecology. 2008;111(4):891-898.
Nguyen JN, Burchette RJ
Outcome after anterior vaginal prolapse repair: a randomized controlled trial
2008
Obstetrics and gynecology
5.426
Single-center prospective randomized controlled trial
Surgery performed between Jan 2005 and Apr 2006
Follow-up conducted at 8 weeks, 6 months, and 1 year
Optimal or satisfactory anterior vaginal support considered cured
Anterior
Mesh
89% cured at 1 year
37
Nguyen JN, Burchette RJ. Outcome after anterior vaginal prolapse repair: a randomized controlled trial. Obstetrics and gynecology. 2008;111(4):891-898.
Nguyen JN, Burchette RJ
Outcome after anterior vaginal prolapse repair: a randomized controlled trial
2008
Obstetrics and gynecology
5.426
Single-center prospective randomized controlled trial
Surgery performed between Jan 2005 and Apr 2006
Follow-up conducted at 8 weeks, 6 months, and 1 year
Optimal or satisfactory anterior vaginal support considered cured
Anterior
Non-mesh
55% cured at 1 year
38 non-mesh patients
Nieminen K, Hiltunen R, Heiskanen E, et al. Symptom resolution and sexual function after anterior vaginal wall repair with or without polypropylene mesh. International urogynecology journal and pelvic floor dysfunction. 2008;19(12):1611-1616.
Nieminen K, Hiltunen R, Heiskanen E, et al
Symptom resolution and sexual function after anterior vaginal wall repair with or without polypropylene mesh
2008
International urogynecology journal and pelvic floor dysfunction
1.51
Multi-center prospective randomized clinical trial
Not reported
Follow-up conducted at 2, 12, and 24 months
POP stage II≤ considered recurrence
Anterior
Mesh
11% at 2 years
105 mesh patients
Nieminen K, Hiltunen R, Heiskanen E, et al. Symptom resolution and sexual function after anterior vaginal wall repair with or without polypropylene mesh. International urogynecology journal and pelvic floor dysfunction. 2008;19(12):1611-1616.
Nieminen K, Hiltunen R, Heiskanen E, et al
Symptom resolution and sexual function after anterior vaginal wall repair with or without polypropylene mesh
2008
International urogynecology journal and pelvic floor dysfunction
1.51
Multi-center prospective randomized clinical trial
Not reported
Follow-up conducted at 2, 12, and 24 months
POP stage II≤ considered recurrence
Anterior
Non-mesh
41% at 2 years
97 non-mesh patients
31st Annual IUGA Meeting, Athens, Greece, 6-9 September 2006. Abstracts. International urogynecology journal and pelvic floor dysfunction. 2006;17 Suppl 2:S57-359.
Ali S, Han HC, Lee LC
Abstracts from the 31st Annual IUGA Meeting, Athens, Greece, 6-9 September 2006
2006
International urogynecology journal and pelvic floor dysfunction
1.51
Prospective randomized cohort study
Surgery performed between Feb 2004 and Jul 2005
Follow-up conducted at 6 months
Recurrence of cystourethrocole
Anterior
Mesh
6.60%
46 mesh patients at final follow-up
Menefee SA, Dyer KY, Lukacz ES, Simsiman AJ, Luber KM, Nguyen JN. Colporrhaphy compared with mesh or graft-reinforced vaginal paravaginal repair for anterior vaginal wall prolapse: a randomized controlled trial. Obstetrics and gynecology. 2011;118(6):1337-1344.
Menefee SA, Dyer KY, Lukacz ES, Simsiman AJ, Luber KM, Nguyen JN
Colporrhaphy compared with mesh or graft-reinforced vaginal paravaginal repair for anterior vaginal wall prolapse: a randomized controlled trial
2011
Obstetrics and gynecology
5.426
Single-center prospective randomized controlled trial, three-armed (porcine graft cohort not reported here)
Surgery performed between Jan 2006 and Sept 2008
Minimum 2 years follow-up
POP stage II≤ considered recurrence
Anterior
Mesh
18% at 2 years
28 mesh patients
Menefee SA, Dyer KY, Lukacz ES, Simsiman AJ, Luber KM, Nguyen JN. Colporrhaphy compared with mesh or graft-reinforced vaginal paravaginal repair for anterior vaginal wall prolapse: a randomized controlled trial. Obstetrics and gynecology. 2011;118(6):1337-1344.
Menefee SA, Dyer KY, Lukacz ES, Simsiman AJ, Luber KM, Nguyen JN
Colporrhaphy compared with mesh or graft-reinforced vaginal paravaginal repair for anterior vaginal wall prolapse: a randomized controlled trial
2011
Obstetrics and gynecology
5.426
Single-center prospective randomized controlled trial, three-armed (porcine graft cohort not reported here)
Surgery performed between Jan 2006 and Sept 2009
Minimum 2 years follow-up
POP stage II≤ considered recurrence
Anterior
Non-mesh
58% at 2 years
24 non-mesh patients
Sivaslioglu AA, Unlubilgin E, Dolen I. A randomized comparison of polypropylene mesh surgery with site-specific surgery in the treatment of cystocoele. International urogynecology journal and pelvic floor dysfunction. 2008;19(4):467-471.
Sivaslioglu AA, Unlubilgin E, Dolen I
A randomized comparison of polypropylene mesh surgery with site-specific surgery in the treatment of cystocoele
2008
International urogynecology journal and pelvic floor dysfunction
1.51
Single-center prospective randomized controlled trial
Surgery performed between Jan 2006 and Jan 2006
Mean follow-up 12 months (range 8-16 months)
POP stage II≤ considered recurrence
Anterior
Mesh
9% at 1 year
43 mesh patients
Sivaslioglu AA, Unlubilgin E, Dolen I. A randomized comparison of polypropylene mesh surgery with site-specific surgery in the treatment of cystocoele. International urogynecology journal and pelvic floor dysfunction. 2008;19(4):467-471.
Sivaslioglu AA, Unlubilgin E, Dolen I
A randomized comparison of polypropylene mesh surgery with site-specific surgery in the treatment of cystocoele
2008
International urogynecology journal and pelvic floor dysfunction
1.51
Single-center prospective randomized controlled trial
Surgery performed between Jan 2006 and Jan 2007
Mean follow-up 12 months (range 8-16 months)
POP stage II≤ considered recurrence
Anterior
Non-Mesh
28% at 1 year
42 non-mesh patients
Sand PK, Koduri S, Lobel RW, et al. Prospective randomized trial of polyglactin 910 mesh to prevent recurrence of cystoceles and rectoceles. American journal of obstetrics and gynecology. 2001;184(7):1357-1362; discussion 1362-1354.
Sand PK, Koduri S, Lobel RW, et al
Prospective randomized trial of polyglactin 910 mesh to prevent recurrence of cystoceles and rectoceles
2001
American journal of obstetrics and gynecology
5.574
Single-center prospective randomized controlled trial
Surgery performed between Sept 1995 and Apr 1999
Follow-up conducted at 12 weeks and 1 year
Cystocele and rectocele recurrences reported separately
Both included
Mesh
At 1 year, 25% recurrent cystocele, 8.2% recurrent rectocele
73 mesh patients
Sand PK, Koduri S, Lobel RW, et al. Prospective randomized trial of polyglactin 910 mesh to prevent recurrence of cystoceles and rectoceles. American journal of obstetrics and gynecology. 2001;184(7):1357-1362; discussion 1362-1354.
Sand PK, Koduri S, Lobel RW, et al
Prospective randomized trial of polyglactin 910 mesh to prevent recurrence of cystoceles and rectoceles
2001
American journal of obstetrics and gynecology
5.574
Single-center prospective randomized controlled trial
Surgery performed between Sept 1995 and Apr 2000
Follow-up conducted at 12 weeks and 1 year
Cystocele and rectocele recurrences reported separately
Both included
Non-mesh
At 1 year, 43% recurrent cystocele, 10% recurrent rectocele
70 non-mesh patients

Quality of Life (P-QoL)
Brocker KA, Alt CD, Corteville C, Hallscheidt P, Lenz F, Sohn C. Short-range clinical, dynamic magnetic resonance imaging and P-QOL questionnaire results after mesh repair in female pelvic organ prolapse. European journal of obstetrics, gynecology, and reproductive biology. 2011;157(1):107-112.
Brocker KA, Alt CD, Corteville C, Hallscheidt P, Lenz F, Sohn C
Short-range clinical, dynamic magnetic resonance imaging and P-QOL questionnaire results after mesh repair in female pelvic organ prolapse
2011
European journal of obstetrics, gynecology, and reproductive biology
1.666
Single-center prospective observational study
Surgery performed between Feb 2008 and Jan 2009
Follow-up performed at 4 and 12 weeks
Non-normalized data reported (0 best score); all domains reported separately
Both included
Mesh
GHP: Pre-op 51.61 ± 24.10, at 12 weeks 29.84 ± 19.81. PI: Pre-op 86.02 ± 20.68, at 12 weeks 26.88 ± 30.33
36 patients
Brocker KA, Alt CD, Corteville C, Hallscheidt P, Lenz F, Sohn C. Short-range clinical, dynamic magnetic resonance imaging and P-QOL questionnaire results after mesh repair in female pelvic organ prolapse. European journal of obstetrics, gynecology, and reproductive biology. 2011;157(1):107-112.
Brocker KA, Alt CD, Rzepka J, Sohn C, Hallscheidt P
One-year dynamic MRI follow-up after vaginal mesh repair: evaluation of clinical, radiological, and quality-of-life results
2015
Acta radiologica
2.011
Single-center prospective observational study
Surgery performed between Jan 2008 and Oct 2009
Follow-up conducted at 12 weeks and 1 year
Non-normalized data reported (0 best score); all domains reported separately
Both included
Mesh
GHP: Pre-op 49.56 ± 23.381, at 1 year 34.38 ± 20.606. PI: Pre-op 79.17 ± 26.638, at 1 year 23.19 ± 30.871
65 patients
Dias MM, de ACR, Bortolini MA, et al. Two-years results of native tissue versus vaginal mesh repair in the treatment of anterior prolapse according to different success criteria: A randomized controlled trial. Neurourology and urodynamics. 2015.
Dias MM, de ACR, Bortolini MA, et al
Two-years results of native tissue versus vaginal mesh repair in the treatment of anterior prolapse according to different success criteria: A randomized controlled trial
2015
Neurourology and urodynamics
3.56
Single-center prospective randomized controlled trial
Surgery performed between Jan 2007 and Feb 2010
Follow-up conducted at 2 years
Non-normalized data reported (0 best score)
Anterior
Mesh
Pre-op mean 43.9; 2-year mean 20.89
37 mesh patients
Dias MM, de ACR, Bortolini MA, et al. Two-years results of native tissue versus vaginal mesh repair in the treatment of anterior prolapse according to different success criteria: A randomized controlled trial. Neurourology and urodynamics. 2015.
Dias MM, de ACR, Bortolini MA, et al
Two-years results of native tissue versus vaginal mesh repair in the treatment of anterior prolapse according to different success criteria: A randomized controlled trial
2015
Neurourology and urodynamics
3.56
Single-center prospective randomized controlled trial
Surgery performed between Jan 2007 and Feb 2010
Follow-up conducted at 2 years
Non-normalized data reported (0 best score)
Anterior
Non-mesh
Pre-op mean 46.0; 2-year mean 22.64
33 non-mesh patients
Maher CF, Feiner B, DeCuyper EM, Nichlos CJ, Hickey KV, O'Rourke P. Laparoscopic sacral colpopexy versus total vaginal mesh for vaginal vault prolapse: a randomized trial. American journal of obstetrics and gynecology. 2011;204(4):360 e361-367.
Maher CF, Feiner B, DeCuyper EM, Nichlos CJ, Hickey KV, O'Rourke P
Laparoscopic sacral colpopexy versus total vaginal mesh for vaginal vault prolapse: a randomized trial
2011
American journal of obstetrics and gynecology
5.574
Single-center prospective randomized controlled trial
Surgery performed between Dec 2005 and Dec 2007
Follow-up conducted at 6, 12, and 30 months
Non-normalized data reported (0 best score); all domains reported separately; post-op scores reported as percent decreases
Both included
Mesh
GHP: Pre-op 24.5 ± 17.2, 19% increase at 2 years. PI: Pre-op 68.5 ± 27.8, 77% decrease at 2 years.
55 mesh patients
Maher CF, Feiner B, DeCuyper EM, Nichlos CJ, Hickey KV, O'Rourke P. Laparoscopic sacral colpopexy versus total vaginal mesh for vaginal vault prolapse: a randomized trial. American journal of obstetrics and gynecology. 2011;204(4):360 e361-367.
Maher CF, Feiner B, DeCuyper EM, Nichlos CJ, Hickey KV, O'Rourke P
Laparoscopic sacral colpopexy versus total vaginal mesh for vaginal vault prolapse: a randomized trial
2012
American journal of obstetrics and gynecology
6.574
Single-center prospective randomized controlled trial
Surgery performed between Dec 2005 and Dec 2008
Follow-up conducted at 6, 12, and 30 months
Non-normalized data reported (0 best score); all domains reported separately; post-op scores reported as percent decreases
Both included
Non-mesh
GHP: Pre-op 29.2 ± 23.9, 13% decrease at 2 years. PI: Pre-op 71.1 ± 28.5, 82% decrease at 2 years.
53 non-mesh patients
Delroy CA, Castro Rde A, Dias MM, et al. The use of transvaginal synthetic mesh for anterior vaginal wall prolapse repair: a randomized controlled trial. International urogynecology journal. 2013;24(11):1899-1907.
Delroy CA, Castro Rde A, Dias MM, et al
The use of transvaginal synthetic mesh for anterior vaginal wall prolapse repair: a randomized controlled trial
2013
International urogynecology journal
1.937
Single-center prospective randomized controlled trial
Surgery performed between Jan 2007 and Jan 2009
Follow-up conducted at 1 year
Non-normalized data reported (0 best score); all domains reported separately
Anterior
Mesh
GHP: Pre-op 46.79 ± 22.343, at 1 year 26.28 ± 21.30. PI: Pre-op 74.35 ± 33.41, at 1 year 3.41 ± 15.06
40 mesh patients
Delroy CA, Castro Rde A, Dias MM, et al. The use of transvaginal synthetic mesh for anterior vaginal wall prolapse repair: a randomized controlled trial. International urogynecology journal. 2013;24(11):1899-1907.
Delroy CA, Castro Rde A, Dias MM, et al
The use of transvaginal synthetic mesh for anterior vaginal wall prolapse repair: a randomized controlled trial
2013
International urogynecology journal
1.937
Single-center prospective randomized controlled trial
Surgery performed between Jan 2007 and Jan 2009
Follow-up conducted at 1 year
Non-normalized data reported (0 best score); all domains reported separately
Anterior
Non-mesh
GHP: Pre-op 42.2 ± 21.2, at 1 year 24.1 ± 10.5. PI: Pre-op 79.3 ± 30.0, at 1 year 3.4 ± 10.3
39 non-mesh patients
Sivaslioglu AA, Unlubilgin E, Dolen I. A randomized comparison of polypropylene mesh surgery with site-specific surgery in the treatment of cystocoele. International urogynecology journal and pelvic floor dysfunction. 2008;19(4):467-471.
Sivaslioglu AA, Unlubilgin E, Dolen I
A randomized comparison of polypropylene mesh surgery with site-specific surgery in the treatment of cystocoele
2008
International urogynecology journal and pelvic floor dysfunction
1.51
Single-center prospective randomized controlled trial
Surgery performed between Jan 2006 and Jan 2007
Mean follow-up 12 months (range 8-16 months)
Non-normalized data reported (0 best score)
Anterior
Mesh
Pre-op: 29.5 ± 26.1; at follow-up: 6.2 ± 5.5
43 mesh patients
Sivaslioglu AA, Unlubilgin E, Dolen I. A randomized comparison of polypropylene mesh surgery with site-specific surgery in the treatment of cystocoele. International urogynecology journal and pelvic floor dysfunction. 2008;19(4):467-471.
Sivaslioglu AA, Unlubilgin E, Dolen I
A randomized comparison of polypropylene mesh surgery with site-specific surgery in the treatment of cystocoele
2009
International urogynecology journal and pelvic floor dysfunction
2.51
Single-center prospective randomized controlled trial
Surgery performed between Jan 2006 and Jan 2008
Mean follow-up 12 months (range 8-16 months)
Non-normalized data reported (0 best score)
Anterior
Non-mesh
Pre-op: 32.4 ± 28.5; at follow-up: 7.5 ± 6.2
42 non-mesh patients
*When all P-QOL domains reported separately, we report only GHP and PI as the most relevant domains to the current question
GHP: General health perceptions
PI: Prolapse impac
